# Supplementary material for: Transcriptome profiling of tendon fibroblasts at the onset of embryonic muscle contraction reveals novel force-responsive genes
Source: eLife. 2025 Mar 27;14:e105802. doi: 10.7554/eLife.105802 (PMC12040314; doi:10.7554/eLife.105802)
Supplement: Figure 4—figure supplement 1—source data 1. [file elife-105802-fig4-figsupp1-data1.xlsx]

## Sheet: matn1 SHT enthesis measurements
Figure 4 -- figure supplement 1 source data (refer Figure 4 --figure supplement 1M)
Dataset: Measurement of matn1 HCR signal intensity in SHT enthesis tenocytes
Embryo	Condition	Cell	Gene	SI
1	WT	1	matn1	13.4
1	WT	2	matn1	7.92
1	WT	3	matn1	3.83
1	WT	4	matn1	4.89
1	WT	5	matn1	3.97
1	WT	6	matn1	13.8
1	WT	7	matn1	19.6
1	WT	8	matn1	7.02
1	WT	9	matn1	4.09
2	WT	1	matn1	5.83
2	WT	2	matn1	7.38
2	WT	3	matn1	3.3
2	WT	4	matn1	2.6
2	WT	5	matn1	7.94
2	WT	6	matn1	10.5
2	WT	7	matn1	5.84
3	WT	1	matn1	17.8
3	WT	2	matn1	15.7
3	WT	3	matn1	12.9
3	WT	4	matn1	3.8
3	WT	5	matn1	5.2
3	WT	6	matn1	5.08
3	WT	7	matn1	2.77
3	WT	8	matn1	2.55
4	WT	1	matn1	3.93
4	WT	2	matn1	3.61
4	WT	3	matn1	3.37
4	WT	4	matn1	4.07
4	WT	5	matn1	1.94
4	WT	6	matn1	3.73
4	WT	7	matn1	4.61
4	WT	8	matn1	3.01
4	WT	9	matn1	7.26
5	WT	1	matn1	8.2
5	WT	2	matn1	3.25
5	WT	3	matn1	5.62
5	WT	4	matn1	3.24
5	WT	5	matn1	2.6
5	WT	6	matn1	5.81
5	WT	7	matn1	3.41
5	WT	8	matn1	2.48
5	WT	9	matn1	3.55
6	WT	1	matn1	8.2
6	WT	2	matn1	7.08
6	WT	3	matn1	3.68
6	WT	4	matn1	5.34
6	WT	5	matn1	2.18
6	WT	6	matn1	1.92
6	WT	7	matn1	4.07
6	WT	8	matn1	2.03
6	WT	9	matn1	2.55
7	WT	1	matn1	3.05
7	WT	2	matn1	2.86
7	WT	3	matn1	2.85
7	WT	4	matn1	2.83
7	WT	5	matn1	3.01
7	WT	6	matn1	2.78
7	WT	7	matn1	1.53
8	WT	1	matn1	15
8	WT	2	matn1	8.14
8	WT	3	matn1	11.6
8	WT	4	matn1	3.83
8	WT	5	matn1	3.87
8	WT	6	matn1	3.92
8	WT	7	matn1	2.74
8	WT	8	matn1	3.86
1	Paralyzed	1	matn1	14.8
1	Paralyzed	2	matn1	15.8
1	Paralyzed	3	matn1	3.47
1	Paralyzed	4	matn1	5.19
1	Paralyzed	5	matn1	5.19
1	Paralyzed	6	matn1	5.98
2	Paralyzed	1	matn1	3.34
2	Paralyzed	2	matn1	5.05
2	Paralyzed	3	matn1	3
2	Paralyzed	4	matn1	0.992
2	Paralyzed	5	matn1	1.35
2	Paralyzed	6	matn1	1.91
2	Paralyzed	7	matn1	1.32
3	Paralyzed	1	matn1	11.5
3	Paralyzed	2	matn1	5.91
3	Paralyzed	3	matn1	8.77
3	Paralyzed	4	matn1	9.87
3	Paralyzed	5	matn1	3.61
3	Paralyzed	6	matn1	9.52
3	Paralyzed	7	matn1	8.82
4	Paralyzed	1	matn1	2.84
4	Paralyzed	2	matn1	5.41
4	Paralyzed	3	matn1	5.28
4	Paralyzed	4	matn1	11.5
4	Paralyzed	5	matn1	4
4	Paralyzed	6	matn1	3.67
4	Paralyzed	7	matn1	6.65
5	Paralyzed	1	matn1	16.7
5	Paralyzed	2	matn1	11.8
5	Paralyzed	3	matn1	9.01
5	Paralyzed	4	matn1	3.09
5	Paralyzed	5	matn1	5.43
5	Paralyzed	6	matn1	14
5	Paralyzed	7	matn1	4.81
5	Paralyzed	8	matn1	8.58
6	Paralyzed	1	matn1	6.88
6	Paralyzed	2	matn1	12.2
7	Paralyzed	1	matn1	11.7
7	Paralyzed	2	matn1	8.57
7	Paralyzed	3	matn1	8.27
7	Paralyzed	4	matn1	14.7
7	Paralyzed	5	matn1	7.7
7	Paralyzed	6	matn1	6.8
8	Paralyzed	1	matn1	13.3
8	Paralyzed	2	matn1	13.9
8	Paralyzed	3	matn1	6.25
8	Paralyzed	4	matn1	6.66
8	Paralyzed	5	matn1	14.5
8	Paralyzed	6	matn1	2.43
8	Paralyzed	7	matn1	4.6
1	Twitching	1	matn1	21.9
1	Twitching	2	matn1	4.38
1	Twitching	3	matn1	5.68
1	Twitching	4	matn1	3.75
1	Twitching	5	matn1	2.38
1	Twitching	6	matn1	2.75
2	Twitching	1	matn1	14.1
2	Twitching	2	matn1	8.92
2	Twitching	3	matn1	4.52
2	Twitching	4	matn1	4.84
2	Twitching	5	matn1	7.34
2	Twitching	6	matn1	4.45
3	Twitching	1	matn1	1.81
3	Twitching	2	matn1	3.68
3	Twitching	3	matn1	2.26
3	Twitching	4	matn1	3.8
3	Twitching	5	matn1	1.79
3	Twitching	6	matn1	2.45
4	Twitching	1	matn1	3.5
4	Twitching	2	matn1	2.15
4	Twitching	3	matn1	3.22
4	Twitching	4	matn1	0.684
4	Twitching	5	matn1	3.64
4	Twitching	6	matn1	0.871
5	Twitching	1	matn1	20.2
5	Twitching	2	matn1	11.5
5	Twitching	3	matn1	19.9
5	Twitching	4	matn1	23.9
5	Twitching	5	matn1	6.2
5	Twitching	6	matn1	4.65
5	Twitching	7	matn1	3.63
6	Twitching	1	matn1	26.3
6	Twitching	2	matn1	11.8
6	Twitching	3	matn1	10.4
6	Twitching	4	matn1	17.8
6	Twitching	5	matn1	8.92
6	Twitching	6	matn1	7.91
1	Full Recovery	1	matn1	17
1	Full Recovery	2	matn1	9.53
1	Full Recovery	3	matn1	5.74
1	Full Recovery	4	matn1	4.93
1	Full Recovery	5	matn1	6.03
1	Full Recovery	6	matn1	7.44
1	Full Recovery	7	matn1	7.73
2	Full Recovery	1	matn1	12.7
2	Full Recovery	2	matn1	7.9
2	Full Recovery	3	matn1	9.88
2	Full Recovery	4	matn1	7.89
2	Full Recovery	5	matn1	9.07
2	Full Recovery	6	matn1	10
3	Full Recovery	1	matn1	7.85
3	Full Recovery	2	matn1	6.35
3	Full Recovery	3	matn1	7.3
3	Full Recovery	4	matn1	5.88
3	Full Recovery	5	matn1	3.86
3	Full Recovery	6	matn1	7.25
3	Full Recovery	7	matn1	8.04
3	Full Recovery	8	matn1	5.65
4	Full Recovery	1	matn1	4.68
4	Full Recovery	2	matn1	5.36
4	Full Recovery	3	matn1	10.8
4	Full Recovery	4	matn1	13.3
4	Full Recovery	5	matn1	5.52
4	Full Recovery	6	matn1	12.1
4	Full Recovery	7	matn1	4.43
4	Full Recovery	8	matn1	4.89
5	Full Recovery	1	matn1	11.9
5	Full Recovery	2	matn1	10.5
5	Full Recovery	3	matn1	13
5	Full Recovery	4	matn1	7.83
5	Full Recovery	5	matn1	7.58
5	Full Recovery	6	matn1	5.59
5	Full Recovery	7	matn1	7.76
6	Full Recovery	1	matn1	6.76
6	Full Recovery	2	matn1	6.68
6	Full Recovery	3	matn1	7.57
6	Full Recovery	4	matn1	3.8
6	Full Recovery	5	matn1	6.47
6	Full Recovery	6	matn1	3.92
6	Full Recovery	7	matn1	4.68
7	Full Recovery	1	matn1	9.74
7	Full Recovery	2	matn1	8.2
7	Full Recovery	3	matn1	11.7
7	Full Recovery	4	matn1	5.39
7	Full Recovery	5	matn1	7.65
7	Full Recovery	6	matn1	4.06
7	Full Recovery	7	matn1	3.24

## Sheet: klf2a SHT enthesis measurements
Figure 4 -- figure supplement 1 source data (refer Figure 4 --figure supplement 1Z)
Dataset: Measurement of klf2a HCR signal intensity in SHT enthesis tenocytes
Embryo	Condition	Cell	Gene	SI
1	WT	1	klf2a	1.07
1	WT	2	klf2a	1.63
1	WT	3	klf2a	1.97
1	WT	4	klf2a	1.7
1	WT	5	klf2a	0.66
1	WT	6	klf2a	1.73
1	WT	7	klf2a	0.988
1	WT	8	klf2a	1.5
1	WT	9	klf2a	3.49
2	WT	1	klf2a	2.04
2	WT	2	klf2a	1.92
2	WT	3	klf2a	1.57
2	WT	4	klf2a	1.8
2	WT	5	klf2a	1.12
2	WT	6	klf2a	1.47
2	WT	7	klf2a	1.08
3	WT	1	klf2a	0.531
3	WT	2	klf2a	0.489
3	WT	3	klf2a	1.18
3	WT	4	klf2a	0.844
3	WT	5	klf2a	0.953
3	WT	6	klf2a	0.641
3	WT	7	klf2a	1.74
3	WT	8	klf2a	2.26
4	WT	1	klf2a	6.56
4	WT	2	klf2a	2.68
4	WT	3	klf2a	3.43
4	WT	4	klf2a	1.4
4	WT	5	klf2a	1.39
4	WT	6	klf2a	0.71
4	WT	7	klf2a	2.47
4	WT	8	klf2a	1.17
4	WT	9	klf2a	0.817
5	WT	1	klf2a	1.53
5	WT	2	klf2a	0.69
5	WT	3	klf2a	1.05
5	WT	4	klf2a	0.775
5	WT	5	klf2a	1.77
5	WT	6	klf2a	1.02
5	WT	7	klf2a	1.14
5	WT	8	klf2a	1.37
5	WT	9	klf2a	1.16
6	WT	1	klf2a	0.769
6	WT	2	klf2a	0.861
6	WT	3	klf2a	0.962
6	WT	4	klf2a	0.571
6	WT	5	klf2a	1.04
6	WT	6	klf2a	1.25
6	WT	7	klf2a	0.806
6	WT	8	klf2a	1.25
6	WT	9	klf2a	1.38
7	WT	1	klf2a	1.66
7	WT	2	klf2a	1.86
7	WT	3	klf2a	1.87
7	WT	4	klf2a	1.7
7	WT	5	klf2a	2.38
7	WT	6	klf2a	3.07
7	WT	7	klf2a	2.06
8	WT	1	klf2a	0.857
8	WT	2	klf2a	1.13
8	WT	3	klf2a	0.768
8	WT	4	klf2a	0.888
8	WT	5	klf2a	0.75
8	WT	6	klf2a	1.04
8	WT	7	klf2a	1.17
8	WT	8	klf2a	1.12
9	WT	1	klf2a	1.3
9	WT	2	klf2a	6.61
9	WT	3	klf2a	1.83
9	WT	4	klf2a	3.1
9	WT	5	klf2a	3.17
9	WT	6	klf2a	4.55
9	WT	7	klf2a	4.78
10	WT	1	klf2a	2
10	WT	2	klf2a	3.88
10	WT	3	klf2a	3.62
10	WT	4	klf2a	2.19
10	WT	5	klf2a	3.77
10	WT	6	klf2a	1.55
11	WT	1	klf2a	1.43
11	WT	2	klf2a	2.33
11	WT	3	klf2a	1.52
11	WT	4	klf2a	5.6
11	WT	5	klf2a	1.85
11	WT	6	klf2a	2.59
11	WT	7	klf2a	2.67
11	WT	8	klf2a	6.04
12	WT	1	klf2a	2.36
12	WT	2	klf2a	2.04
12	WT	3	klf2a	1.48
12	WT	4	klf2a	2.24
12	WT	5	klf2a	2.57
12	WT	6	klf2a	1.3
13	WT	1	klf2a	1.81
13	WT	2	klf2a	2.54
13	WT	3	klf2a	1.32
13	WT	4	klf2a	2.06
13	WT	5	klf2a	2.06
13	WT	6	klf2a	2.98
13	WT	7	klf2a	4.47
13	WT	8	klf2a	3.36
14	WT	1	klf2a	0.841
14	WT	2	klf2a	1.28
14	WT	3	klf2a	0.563
14	WT	4	klf2a	0.645
14	WT	5	klf2a	1.08
15	WT	1	klf2a	1.55
15	WT	2	klf2a	0.785
15	WT	3	klf2a	0.748
15	WT	4	klf2a	0.353
15	WT	5	klf2a	1.24
15	WT	6	klf2a	0.393
1	Paralyzed	1	klf2a	1.4
1	Paralyzed	2	klf2a	2.04
1	Paralyzed	3	klf2a	4.18
1	Paralyzed	4	klf2a	3.09
1	Paralyzed	5	klf2a	5.75
1	Paralyzed	6	klf2a	5.48
2	Paralyzed	1	klf2a	1.44
2	Paralyzed	2	klf2a	2.08
2	Paralyzed	3	klf2a	2.24
2	Paralyzed	4	klf2a	2.57
2	Paralyzed	5	klf2a	1.41
2	Paralyzed	6	klf2a	2.05
2	Paralyzed	7	klf2a	4.51
3	Paralyzed	1	klf2a	1.28
3	Paralyzed	2	klf2a	1.8
3	Paralyzed	3	klf2a	1.77
3	Paralyzed	4	klf2a	1.39
3	Paralyzed	5	klf2a	1.21
3	Paralyzed	6	klf2a	1.26
3	Paralyzed	7	klf2a	2.91
4	Paralyzed	1	klf2a	1.89
4	Paralyzed	2	klf2a	1.7
4	Paralyzed	3	klf2a	4.79
4	Paralyzed	4	klf2a	3.23
4	Paralyzed	5	klf2a	2.19
4	Paralyzed	6	klf2a	5.13
4	Paralyzed	7	klf2a	1.55
5	Paralyzed	1	klf2a	2.91
5	Paralyzed	2	klf2a	1.87
5	Paralyzed	3	klf2a	3.51
5	Paralyzed	4	klf2a	1.83
5	Paralyzed	5	klf2a	2.51
5	Paralyzed	6	klf2a	4
5	Paralyzed	7	klf2a	2.29
5	Paralyzed	8	klf2a	2.26
6	Paralyzed	1	klf2a	2.03
6	Paralyzed	2	klf2a	2.01
7	Paralyzed	1	klf2a	3.61
7	Paralyzed	2	klf2a	1.31
7	Paralyzed	3	klf2a	3.38
7	Paralyzed	4	klf2a	2.81
7	Paralyzed	5	klf2a	2.48
7	Paralyzed	6	klf2a	1.22
8	Paralyzed	1	klf2a	0.982
8	Paralyzed	2	klf2a	0.752
8	Paralyzed	3	klf2a	1.9
8	Paralyzed	4	klf2a	1.3
8	Paralyzed	5	klf2a	0.611
8	Paralyzed	6	klf2a	2.87
8	Paralyzed	7	klf2a	3.16
9	Paralyzed	1	klf2a	5.51
9	Paralyzed	2	klf2a	2.64
9	Paralyzed	3	klf2a	2.83
9	Paralyzed	4	klf2a	4.58
9	Paralyzed	5	klf2a	4.54
9	Paralyzed	6	klf2a	4.56
9	Paralyzed	7	klf2a	4.11
10	Paralyzed	1	klf2a	4.4
10	Paralyzed	2	klf2a	5.05
10	Paralyzed	3	klf2a	5.1
10	Paralyzed	4	klf2a	3.92
10	Paralyzed	5	klf2a	4.5
10	Paralyzed	6	klf2a	2.76
11	Paralyzed	1	klf2a	2.66
11	Paralyzed	2	klf2a	1.68
11	Paralyzed	3	klf2a	3.34
11	Paralyzed	4	klf2a	4.78
11	Paralyzed	5	klf2a	4.51
11	Paralyzed	6	klf2a	3.73
11	Paralyzed	7	klf2a	3.79
11	Paralyzed	8	klf2a	5.26
12	Paralyzed	1	klf2a	5.99
12	Paralyzed	2	klf2a	4.16
12	Paralyzed	3	klf2a	2.59
12	Paralyzed	4	klf2a	1.89
12	Paralyzed	5	klf2a	4.07
12	Paralyzed	6	klf2a	2.92
12	Paralyzed	7	klf2a	1.97
13	Paralyzed	1	klf2a	2.58
13	Paralyzed	2	klf2a	5.15
13	Paralyzed	3	klf2a	5.28
13	Paralyzed	4	klf2a	5.32
13	Paralyzed	5	klf2a	5.29
13	Paralyzed	6	klf2a	3.81
14	Paralyzed	1	klf2a	2.35
14	Paralyzed	2	klf2a	5.56
14	Paralyzed	3	klf2a	2.73
14	Paralyzed	4	klf2a	2.48
14	Paralyzed	5	klf2a	1.82
14	Paralyzed	6	klf2a	4.66
15	Paralyzed	1	klf2a	3.09
15	Paralyzed	2	klf2a	2.16
15	Paralyzed	3	klf2a	5.63
15	Paralyzed	4	klf2a	13.6
15	Paralyzed	5	klf2a	11.7
16	Paralyzed	1	klf2a	2.24
16	Paralyzed	2	klf2a	3.84
16	Paralyzed	3	klf2a	2.43
16	Paralyzed	4	klf2a	2.76
16	Paralyzed	5	klf2a	3.33
16	Paralyzed	6	klf2a	3.45
16	Paralyzed	7	klf2a	3.46
16	Paralyzed	8	klf2a	6.77
1	Twitching	1	klf2a	1.26
1	Twitching	2	klf2a	1.57
1	Twitching	3	klf2a	1.93
1	Twitching	4	klf2a	2.01
1	Twitching	5	klf2a	1.5
1	Twitching	6	klf2a	1.48
2	Twitching	1	klf2a	1.99
2	Twitching	2	klf2a	10.5
2	Twitching	3	klf2a	5.54
2	Twitching	4	klf2a	4.85
2	Twitching	5	klf2a	7.64
2	Twitching	6	klf2a	3.96
3	Twitching	1	klf2a	4.42
3	Twitching	2	klf2a	3.74
3	Twitching	3	klf2a	3.24
3	Twitching	4	klf2a	1.33
3	Twitching	5	klf2a	3.07
3	Twitching	6	klf2a	2.98
4	Twitching	1	klf2a	0.811
4	Twitching	2	klf2a	1.77
4	Twitching	3	klf2a	1.59
4	Twitching	4	klf2a	0.917
4	Twitching	5	klf2a	1.17
4	Twitching	6	klf2a	0.985
5	Twitching	1	klf2a	1.5
5	Twitching	2	klf2a	1.6
5	Twitching	3	klf2a	2.42
5	Twitching	4	klf2a	1.15
5	Twitching	5	klf2a	4.29
5	Twitching	6	klf2a	4.73
5	Twitching	7	klf2a	1.99
6	Twitching	1	klf2a	2.99
6	Twitching	2	klf2a	2.15
6	Twitching	3	klf2a	3.59
6	Twitching	4	klf2a	1.61
6	Twitching	5	klf2a	5.1
6	Twitching	6	klf2a	7.41
7	Twitching	1	klf2a	2.28
7	Twitching	2	klf2a	3.2
7	Twitching	3	klf2a	4.11
7	Twitching	4	klf2a	4.55
7	Twitching	5	klf2a	2.08
7	Twitching	6	klf2a	6.89
7	Twitching	7	klf2a	2.39
7	Twitching	8	klf2a	3.44
8	Twitching	1	klf2a	9.15
8	Twitching	2	klf2a	5.48
8	Twitching	3	klf2a	4.13
8	Twitching	4	klf2a	3.91
8	Twitching	5	klf2a	1.81
9	Twitching	1	klf2a	4.45
9	Twitching	2	klf2a	1.94
9	Twitching	3	klf2a	2.54
9	Twitching	4	klf2a	4.13
9	Twitching	5	klf2a	4.44
10	Twitching	1	klf2a	1.27
10	Twitching	2	klf2a	2.68
10	Twitching	3	klf2a	3.08
10	Twitching	4	klf2a	9.39
10	Twitching	5	klf2a	4.13
11	Twitching	1	klf2a	3.26
11	Twitching	2	klf2a	2.78
11	Twitching	3	klf2a	5.46
11	Twitching	4	klf2a	0.961
11	Twitching	5	klf2a	6.7
12	Twitching	1	klf2a	1.97
12	Twitching	2	klf2a	2.07
12	Twitching	3	klf2a	9.11
12	Twitching	4	klf2a	2.68
12	Twitching	5	klf2a	3.27
12	Twitching	6	klf2a	3.14
12	Twitching	7	klf2a	3.56
13	Twitching	1	klf2a	1.45
13	Twitching	2	klf2a	2.74
13	Twitching	3	klf2a	2.01
13	Twitching	4	klf2a	1.33
13	Twitching	5	klf2a	1.69
13	Twitching	6	klf2a	3.14
13	Twitching	7	klf2a	1.23
13	Twitching	8	klf2a	3.04
14	Twitching	1	klf2a	2.29
14	Twitching	2	klf2a	4.22
14	Twitching	3	klf2a	0.785
1	Full Recovery	1	klf2a	1.49
1	Full Recovery	2	klf2a	2.01
1	Full Recovery	3	klf2a	2.51
1	Full Recovery	4	klf2a	7.54
1	Full Recovery	5	klf2a	5.15
1	Full Recovery	6	klf2a	6.74
1	Full Recovery	7	klf2a	7.35
2	Full Recovery	1	klf2a	3.59
2	Full Recovery	2	klf2a	3.5
2	Full Recovery	3	klf2a	4.93
2	Full Recovery	4	klf2a	5.89
2	Full Recovery	5	klf2a	8.2
2	Full Recovery	6	klf2a	4.54
3	Full Recovery	1	klf2a	5.05
3	Full Recovery	2	klf2a	3.63
3	Full Recovery	3	klf2a	1.77
3	Full Recovery	4	klf2a	1.76
3	Full Recovery	5	klf2a	2.23
3	Full Recovery	6	klf2a	5.84
3	Full Recovery	7	klf2a	3.28
3	Full Recovery	8	klf2a	4.23
4	Full Recovery	1	klf2a	2.68
4	Full Recovery	2	klf2a	4.3
4	Full Recovery	3	klf2a	3.41
4	Full Recovery	4	klf2a	1.1
4	Full Recovery	5	klf2a	5.25
4	Full Recovery	6	klf2a	1.66
4	Full Recovery	7	klf2a	4.91
4	Full Recovery	8	klf2a	5.97
5	Full Recovery	1	klf2a	3.97
5	Full Recovery	2	klf2a	2.12
5	Full Recovery	3	klf2a	2.32
5	Full Recovery	4	klf2a	2.11
5	Full Recovery	5	klf2a	5.8
5	Full Recovery	6	klf2a	3.66
5	Full Recovery	7	klf2a	7.57
6	Full Recovery	1	klf2a	4.18
6	Full Recovery	2	klf2a	1.36
6	Full Recovery	3	klf2a	1.69
6	Full Recovery	4	klf2a	2.64
6	Full Recovery	5	klf2a	4.49
6	Full Recovery	6	klf2a	5.03
6	Full Recovery	7	klf2a	2.46
7	Full Recovery	1	klf2a	1.98
7	Full Recovery	2	klf2a	8.52
7	Full Recovery	3	klf2a	4.62
7	Full Recovery	4	klf2a	3.22
7	Full Recovery	5	klf2a	3.98
7	Full Recovery	6	klf2a	2.79
7	Full Recovery	7	klf2a	3.84
8	Full Recovery	1	klf2a	6.45
8	Full Recovery	2	klf2a	3.46
8	Full Recovery	3	klf2a	2.9
8	Full Recovery	4	klf2a	2.2
8	Full Recovery	5	klf2a	5.19
8	Full Recovery	6	klf2a	2.19
8	Full Recovery	7	klf2a	8.86
8	Full Recovery	8	klf2a	3.98
8	Full Recovery	9	klf2a	4.34
9	Full Recovery	1	klf2a	7.03
9	Full Recovery	2	klf2a	14.9
9	Full Recovery	3	klf2a	3.34
9	Full Recovery	4	klf2a	5.1
9	Full Recovery	5	klf2a	4.7
9	Full Recovery	6	klf2a	5.36
9	Full Recovery	7	klf2a	6.46
10	Full Recovery	1	klf2a	3.35
10	Full Recovery	2	klf2a	6.33
10	Full Recovery	3	klf2a	13.8
10	Full Recovery	4	klf2a	9.77
10	Full Recovery	5	klf2a	3.82
10	Full Recovery	6	klf2a	10
10	Full Recovery	7	klf2a	7.55
10	Full Recovery	8	klf2a	6.62
11	Full Recovery	1	klf2a	9.06
11	Full Recovery	2	klf2a	6.59
11	Full Recovery	3	klf2a	8.25
11	Full Recovery	4	klf2a	7.43
11	Full Recovery	5	klf2a	7.01
11	Full Recovery	6	klf2a	3.65
11	Full Recovery	7	klf2a	8.81
11	Full Recovery	8	klf2a	7.28
