# Supplementary material for: Transcriptome profiling of tendon fibroblasts at the onset of embryonic muscle contraction reveals novel force-responsive genes
Source: eLife. 2025 Mar 27;14:e105802. doi: 10.7554/eLife.105802 (PMC12040314; doi:10.7554/eLife.105802)
Supplement: Figure 4—source data 1. [file elife-105802-fig4-data1.xlsx]

## Sheet: matn1 IMA enthesis measurements
Figure 4 source data (refer Figure 4U)
Dataset: Measurement of matn1 HCR signal intensity in IMA enthesis tenocytes
Embryo	Condition	Cell	Gene	SI
1	WT	1	matn1	2.82
1	WT	2	matn1	2.08
1	WT	3	matn1	1.99
1	WT	4	matn1	2.14
1	WT	5	matn1	2.1
1	WT	6	matn1	1.82
2	WT	1	matn1	3.17
2	WT	2	matn1	3.07
2	WT	3	matn1	2.24
2	WT	4	matn1	5.17
2	WT	5	matn1	2.8
2	WT	6	matn1	4.61
3	WT	1	matn1	2.52
3	WT	2	matn1	2.58
3	WT	3	matn1	4.69
3	WT	4	matn1	6.58
3	WT	5	matn1	4.38
3	WT	6	matn1	3.37
3	WT	7	matn1	1.97
4	WT	1	matn1	9.14
4	WT	2	matn1	1.81
4	WT	3	matn1	3.48
4	WT	4	matn1	3.49
4	WT	5	matn1	3.41
4	WT	6	matn1	4.06
5	WT	1	matn1	8.85
5	WT	2	matn1	1.72
5	WT	3	matn1	1.5
5	WT	4	matn1	1.78
5	WT	5	matn1	1.76
5	WT	6	matn1	1.76
5	WT	7	matn1	2.25
5	WT	8	matn1	1.8
6	WT	1	matn1	2.07
6	WT	2	matn1	2.39
6	WT	3	matn1	3
6	WT	4	matn1	2.02
6	WT	5	matn1	2.17
6	WT	6	matn1	2.05
6	WT	7	matn1	2.21
6	WT	8	matn1	2.14
7	WT	1	matn1	6.98
7	WT	2	matn1	8.69
7	WT	3	matn1	1.64
7	WT	4	matn1	1.34
7	WT	5	matn1	2.06
7	WT	6	matn1	1.7
7	WT	7	matn1	1.25
8	WT	1	matn1	2.48
8	WT	2	matn1	3.14
8	WT	3	matn1	2.66
8	WT	4	matn1	2.89
8	WT	5	matn1	2.29
8	WT	6	matn1	2.5
8	WT	7	matn1	3.82
8	WT	8	matn1	2.59
1	Paralyzed	1	matn1	6.02
1	Paralyzed	2	matn1	2.58
1	Paralyzed	3	matn1	1.77
1	Paralyzed	4	matn1	1.51
1	Paralyzed	5	matn1	4.19
1	Paralyzed	6	matn1	1.71
1	Paralyzed	7	matn1	4.19
1	Paralyzed	8	matn1	3.62
2	Paralyzed	1	matn1	1.58
2	Paralyzed	2	matn1	1.69
2	Paralyzed	3	matn1	1.15
3	Paralyzed	1	matn1	3.25
3	Paralyzed	2	matn1	3.38
3	Paralyzed	3	matn1	2.07
3	Paralyzed	4	matn1	1.27
3	Paralyzed	5	matn1	1.42
3	Paralyzed	6	matn1	1.7
3	Paralyzed	7	matn1	1.5
4	Paralyzed	1	matn1	2.46
4	Paralyzed	2	matn1	2.68
4	Paralyzed	3	matn1	3.43
4	Paralyzed	4	matn1	4.7
4	Paralyzed	5	matn1	4.08
4	Paralyzed	6	matn1	3.55
5	Paralyzed	1	matn1	2.5
5	Paralyzed	2	matn1	1.92
5	Paralyzed	3	matn1	2.33
5	Paralyzed	4	matn1	2.24
5	Paralyzed	5	matn1	2.43
5	Paralyzed	6	matn1	3.41
5	Paralyzed	7	matn1	5.52
6	Paralyzed	1	matn1	2.38
6	Paralyzed	2	matn1	7.3
6	Paralyzed	3	matn1	4.04
6	Paralyzed	4	matn1	2.21
6	Paralyzed	5	matn1	4.29
6	Paralyzed	6	matn1	4.16
6	Paralyzed	7	matn1	14.8
7	Paralyzed	1	matn1	5.66
7	Paralyzed	2	matn1	4.05
7	Paralyzed	3	matn1	3.21
7	Paralyzed	4	matn1	6.91
7	Paralyzed	5	matn1	5.21
7	Paralyzed	6	matn1	6.99
7	Paralyzed	7	matn1	4.11
7	Paralyzed	8	matn1	5.99
8	Paralyzed	1	matn1	1.94
8	Paralyzed	2	matn1	2.35
8	Paralyzed	3	matn1	2.12
8	Paralyzed	4	matn1	3.34
8	Paralyzed	5	matn1	2.65
8	Paralyzed	6	matn1	3.85
1	Twitching	1	matn1	2.59
1	Twitching	2	matn1	2.21
1	Twitching	3	matn1	2
1	Twitching	4	matn1	3.09
1	Twitching	5	matn1	4.51
1	Twitching	6	matn1	2.99
1	Twitching	7	matn1	2.92
2	Twitching	1	matn1	5.15
2	Twitching	2	matn1	3.72
2	Twitching	3	matn1	4.12
2	Twitching	4	matn1	3.23
2	Twitching	5	matn1	4.94
2	Twitching	6	matn1	3.44
2	Twitching	7	matn1	3.9
3	Twitching	1	matn1	2.4
3	Twitching	2	matn1	2.84
3	Twitching	3	matn1	1.77
3	Twitching	4	matn1	1.84
3	Twitching	5	matn1	5.22
3	Twitching	6	matn1	3.67
4	Twitching	1	matn1	4.59
4	Twitching	2	matn1	3.04
4	Twitching	3	matn1	1.34
4	Twitching	4	matn1	3.32
4	Twitching	5	matn1	1.67
4	Twitching	6	matn1	1.68
4	Twitching	7	matn1	2.39
5	Twitching	1	matn1	2.61
5	Twitching	2	matn1	3.1
5	Twitching	3	matn1	2.9
5	Twitching	4	matn1	2.31
5	Twitching	5	matn1	2.69
5	Twitching	6	matn1	1.87
5	Twitching	7	matn1	1.69
6	Twitching	1	matn1	3.11
6	Twitching	2	matn1	3.29
6	Twitching	3	matn1	5.38
6	Twitching	4	matn1	7.61
6	Twitching	5	matn1	3.68
6	Twitching	6	matn1	4.46
6	Twitching	7	matn1	3.04
1	Full Recovery	1	matn1	3.16
1	Full Recovery	2	matn1	1.71
1	Full Recovery	3	matn1	3.87
1	Full Recovery	4	matn1	5.43
1	Full Recovery	5	matn1	3.84
1	Full Recovery	6	matn1	3.15
2	Full Recovery	1	matn1	6.9
2	Full Recovery	2	matn1	5.65
2	Full Recovery	3	matn1	5.76
2	Full Recovery	4	matn1	5.92
2	Full Recovery	5	matn1	3.98
2	Full Recovery	6	matn1	6.71
2	Full Recovery	7	matn1	5.39
3	Full Recovery	1	matn1	5.64
3	Full Recovery	2	matn1	3.18
3	Full Recovery	3	matn1	4.24
3	Full Recovery	4	matn1	3.49
3	Full Recovery	5	matn1	3.46
3	Full Recovery	6	matn1	4.07
3	Full Recovery	7	matn1	2.78
3	Full Recovery	8	matn1	2.69
4	Full Recovery	1	matn1	3.58
4	Full Recovery	2	matn1	4.39
4	Full Recovery	3	matn1	5.31
4	Full Recovery	4	matn1	5.21
4	Full Recovery	5	matn1	9.73
4	Full Recovery	6	matn1	8.77
4	Full Recovery	7	matn1	5.83
5	Full Recovery	1	matn1	4.52
5	Full Recovery	2	matn1	4.63
5	Full Recovery	3	matn1	5.07
5	Full Recovery	4	matn1	4.03
5	Full Recovery	5	matn1	3.43
5	Full Recovery	6	matn1	5.28
5	Full Recovery	7	matn1	3.68
5	Full Recovery	8	matn1	3.66
6	Full Recovery	1	matn1	3.26
6	Full Recovery	2	matn1	5.04
6	Full Recovery	3	matn1	2.96
6	Full Recovery	4	matn1	3.52
6	Full Recovery	5	matn1	4.68
6	Full Recovery	6	matn1	3.46
6	Full Recovery	7	matn1	2.17
6	Full Recovery	8	matn1	2.78
7	Full Recovery	1	matn1	5.82
7	Full Recovery	2	matn1	4.87
7	Full Recovery	3	matn1	4.79
7	Full Recovery	4	matn1	5.37
7	Full Recovery	5	matn1	5
7	Full Recovery	6	matn1	3.71
7	Full Recovery	7	matn1	3.02
