# Supplementary material for: Transcriptome profiling of tendon fibroblasts at the onset of embryonic muscle contraction reveals novel force-responsive genes
Source: eLife. 2025 Mar 27;14:e105802. doi: 10.7554/eLife.105802 (PMC12040314; doi:10.7554/eLife.105802)
Supplement: Figure 5—figure supplement 1—source data 1. [file elife-105802-fig5-figsupp1-data1.xlsx]

## Sheet: klf2a IMA enthesis measurements
Figure 5 -- figure supplement 1 source data (refer Figure 5 --figure supplement 1M)
Dataset: Measurement of klf2a HCR signal intensity in IMA enthesis tenocytes
Embryo	Condition	Cell	Gene	SI
1	WT	1	klf2a	0.769
1	WT	2	klf2a	1.26
1	WT	3	klf2a	1.24
1	WT	4	klf2a	1.18
1	WT	5	klf2a	1.42
1	WT	6	klf2a	0.982
2	WT	1	klf2a	1.2
2	WT	2	klf2a	1.2
2	WT	3	klf2a	1.25
2	WT	4	klf2a	0.863
2	WT	5	klf2a	1.16
2	WT	6	klf2a	1.05
3	WT	1	klf2a	1.19
3	WT	2	klf2a	0.508
3	WT	3	klf2a	0.673
3	WT	4	klf2a	0.627
3	WT	5	klf2a	1.01
3	WT	6	klf2a	0.856
3	WT	7	klf2a	0.989
4	WT	1	klf2a	0.697
4	WT	2	klf2a	1.3
4	WT	3	klf2a	1.18
4	WT	4	klf2a	0.921
4	WT	5	klf2a	1.09
4	WT	6	klf2a	1.03
5	WT	1	klf2a	0.854
5	WT	2	klf2a	0.906
5	WT	3	klf2a	0.493
5	WT	4	klf2a	0.589
5	WT	5	klf2a	0.616
5	WT	6	klf2a	0.794
5	WT	7	klf2a	1.43
5	WT	8	klf2a	1.03
6	WT	1	klf2a	0.504
6	WT	2	klf2a	0.563
6	WT	3	klf2a	0.526
6	WT	4	klf2a	0.416
6	WT	5	klf2a	0.556
6	WT	6	klf2a	0.47
6	WT	7	klf2a	0.614
6	WT	8	klf2a	0.479
7	WT	1	klf2a	1.6
7	WT	2	klf2a	0.633
7	WT	3	klf2a	0.575
7	WT	4	klf2a	0.51
7	WT	5	klf2a	0.816
7	WT	6	klf2a	0.598
7	WT	7	klf2a	0.557
8	WT	1	klf2a	1.25
8	WT	2	klf2a	0.89
8	WT	3	klf2a	0.931
8	WT	4	klf2a	0.871
8	WT	5	klf2a	1.23
8	WT	6	klf2a	0.783
8	WT	7	klf2a	1.19
8	WT	8	klf2a	1.01
9	WT	1	klf2a	2.07
9	WT	2	klf2a	1.5
9	WT	3	klf2a	2.61
9	WT	4	klf2a	1.41
9	WT	5	klf2a	1.53
9	WT	6	klf2a	1.12
9	WT	7	klf2a	1.59
9	WT	8	klf2a	1.26
10	WT	1	klf2a	1.75
10	WT	2	klf2a	2.47
10	WT	3	klf2a	2.08
10	WT	4	klf2a	1.61
10	WT	5	klf2a	2.86
10	WT	6	klf2a	2.65
10	WT	7	klf2a	2.16
11	WT	1	klf2a	1.76
11	WT	2	klf2a	1.16
11	WT	3	klf2a	3.44
11	WT	4	klf2a	2.35
11	WT	5	klf2a	3.2
11	WT	6	klf2a	1.66
11	WT	7	klf2a	3.32
11	WT	8	klf2a	2.22
12	WT	1	klf2a	2.06
12	WT	2	klf2a	3.25
12	WT	3	klf2a	2.8
12	WT	4	klf2a	4.64
12	WT	5	klf2a	1.76
12	WT	6	klf2a	1.47
12	WT	7	klf2a	1.29
13	WT	1	klf2a	1.66
13	WT	2	klf2a	3.43
13	WT	3	klf2a	3.56
13	WT	4	klf2a	2.57
13	WT	5	klf2a	2.51
13	WT	6	klf2a	1.38
13	WT	7	klf2a	3.09
14	WT	1	klf2a	0.977
14	WT	2	klf2a	1.34
14	WT	3	klf2a	1.06
14	WT	4	klf2a	1.06
15	WT	1	klf2a	0.817
15	WT	2	klf2a	0.698
15	WT	3	klf2a	0.954
15	WT	4	klf2a	0.47
15	WT	5	klf2a	0.734
15	WT	6	klf2a	0.732
15	WT	7	klf2a	0.383
1	Paralyzed	1	klf2a	3.37
1	Paralyzed	2	klf2a	5.41
1	Paralyzed	3	klf2a	4.37
1	Paralyzed	4	klf2a	3.51
1	Paralyzed	5	klf2a	2.45
1	Paralyzed	6	klf2a	2.23
1	Paralyzed	7	klf2a	2.19
1	Paralyzed	8	klf2a	2.25
2	Paralyzed	1	klf2a	5.03
2	Paralyzed	2	klf2a	3
2	Paralyzed	3	klf2a	2.58
3	Paralyzed	1	klf2a	2.73
3	Paralyzed	2	klf2a	1.98
3	Paralyzed	3	klf2a	2.23
3	Paralyzed	4	klf2a	7.08
3	Paralyzed	5	klf2a	2.35
3	Paralyzed	6	klf2a	2.11
3	Paralyzed	7	klf2a	2.83
4	Paralyzed	1	klf2a	1.31
4	Paralyzed	2	klf2a	2.43
4	Paralyzed	3	klf2a	2.7
4	Paralyzed	4	klf2a	2.32
4	Paralyzed	5	klf2a	1.86
4	Paralyzed	6	klf2a	1.79
5	Paralyzed	1	klf2a	3.12
5	Paralyzed	2	klf2a	2.83
5	Paralyzed	3	klf2a	5.47
5	Paralyzed	4	klf2a	1.9
5	Paralyzed	5	klf2a	1.95
5	Paralyzed	6	klf2a	3.55
5	Paralyzed	7	klf2a	4.83
6	Paralyzed	1	klf2a	3.25
6	Paralyzed	2	klf2a	2.84
6	Paralyzed	3	klf2a	3.47
6	Paralyzed	4	klf2a	2.14
6	Paralyzed	5	klf2a	4.21
6	Paralyzed	6	klf2a	1.66
6	Paralyzed	7	klf2a	1.3
7	Paralyzed	1	klf2a	2.44
7	Paralyzed	2	klf2a	2.4
7	Paralyzed	3	klf2a	2.55
7	Paralyzed	4	klf2a	1.84
7	Paralyzed	5	klf2a	4.52
7	Paralyzed	6	klf2a	1.3
7	Paralyzed	7	klf2a	2.09
7	Paralyzed	8	klf2a	3.49
8	Paralyzed	1	klf2a	2
8	Paralyzed	2	klf2a	2.36
8	Paralyzed	3	klf2a	2.3
8	Paralyzed	4	klf2a	3.67
8	Paralyzed	5	klf2a	4.02
8	Paralyzed	6	klf2a	1.46
9	Paralyzed	1	klf2a	8.39
9	Paralyzed	2	klf2a	6.12
9	Paralyzed	3	klf2a	2.98
9	Paralyzed	4	klf2a	2.51
9	Paralyzed	5	klf2a	3.14
9	Paralyzed	6	klf2a	2.02
9	Paralyzed	7	klf2a	3.64
9	Paralyzed	8	klf2a	1.86
10	Paralyzed	1	klf2a	2.41
10	Paralyzed	2	klf2a	5.62
10	Paralyzed	3	klf2a	2.54
10	Paralyzed	4	klf2a	3.52
10	Paralyzed	5	klf2a	3.41
10	Paralyzed	6	klf2a	2.95
10	Paralyzed	7	klf2a	2.26
10	Paralyzed	8	klf2a	4.37
11	Paralyzed	1	klf2a	4.04
11	Paralyzed	2	klf2a	4.91
11	Paralyzed	3	klf2a	4.25
11	Paralyzed	4	klf2a	4.07
11	Paralyzed	5	klf2a	6.57
11	Paralyzed	6	klf2a	3.86
11	Paralyzed	7	klf2a	4.02
12	Paralyzed	1	klf2a	2.88
12	Paralyzed	2	klf2a	2.79
12	Paralyzed	3	klf2a	2.31
12	Paralyzed	4	klf2a	3.53
12	Paralyzed	5	klf2a	3.96
12	Paralyzed	6	klf2a	3.35
12	Paralyzed	7	klf2a	2.97
13	Paralyzed	1	klf2a	2.73
13	Paralyzed	2	klf2a	2.36
13	Paralyzed	3	klf2a	4.33
13	Paralyzed	4	klf2a	2.78
13	Paralyzed	5	klf2a	2.96
13	Paralyzed	6	klf2a	4.43
13	Paralyzed	7	klf2a	2.89
13	Paralyzed	8	klf2a	2.77
14	Paralyzed	1	klf2a	0.997
14	Paralyzed	2	klf2a	1.25
14	Paralyzed	3	klf2a	0.931
14	Paralyzed	4	klf2a	1.61
14	Paralyzed	5	klf2a	1.97
14	Paralyzed	6	klf2a	1.4
14	Paralyzed	7	klf2a	1.66
14	Paralyzed	8	klf2a	0.896
15	Paralyzed	1	klf2a	8.15
15	Paralyzed	2	klf2a	5.76
15	Paralyzed	3	klf2a	9.11
15	Paralyzed	4	klf2a	7.62
15	Paralyzed	5	klf2a	2.38
15	Paralyzed	6	klf2a	4.27
15	Paralyzed	7	klf2a	10.6
15	Paralyzed	8	klf2a	8.21
16	Paralyzed	1	klf2a	2.17
16	Paralyzed	2	klf2a	2.49
16	Paralyzed	3	klf2a	1.52
16	Paralyzed	4	klf2a	2.11
16	Paralyzed	5	klf2a	2.01
16	Paralyzed	6	klf2a	1.02
16	Paralyzed	7	klf2a	0.747
16	Paralyzed	8	klf2a	1.22
1	Twitching	1	klf2a	2.44
1	Twitching	2	klf2a	2.2
1	Twitching	3	klf2a	1.42
1	Twitching	4	klf2a	1.48
1	Twitching	5	klf2a	2.91
1	Twitching	6	klf2a	3.39
1	Twitching	7	klf2a	4.09
2	Twitching	1	klf2a	4.7
2	Twitching	2	klf2a	5.05
2	Twitching	3	klf2a	8.22
2	Twitching	4	klf2a	5.72
2	Twitching	5	klf2a	4.94
2	Twitching	6	klf2a	8.91
2	Twitching	7	klf2a	2.54
3	Twitching	1	klf2a	1.99
3	Twitching	2	klf2a	1.55
3	Twitching	3	klf2a	1.65
3	Twitching	4	klf2a	3.29
3	Twitching	5	klf2a	1.73
3	Twitching	6	klf2a	1.51
4	Twitching	1	klf2a	1.68
4	Twitching	2	klf2a	1.55
4	Twitching	3	klf2a	0.971
4	Twitching	4	klf2a	1.34
4	Twitching	5	klf2a	1.22
4	Twitching	6	klf2a	0.837
4	Twitching	7	klf2a	1.57
5	Twitching	1	klf2a	2.46
5	Twitching	2	klf2a	2.77
5	Twitching	3	klf2a	2.28
5	Twitching	4	klf2a	2.25
5	Twitching	5	klf2a	2.13
5	Twitching	6	klf2a	2.18
5	Twitching	7	klf2a	2.58
6	Twitching	1	klf2a	2.92
6	Twitching	2	klf2a	2.3
6	Twitching	3	klf2a	4.82
6	Twitching	4	klf2a	9
6	Twitching	5	klf2a	2.85
6	Twitching	6	klf2a	2.33
6	Twitching	7	klf2a	2.68
7	Twitching	1	klf2a	2.29
7	Twitching	2	klf2a	1.29
7	Twitching	3	klf2a	0.929
7	Twitching	4	klf2a	1.1
7	Twitching	5	klf2a	0.687
7	Twitching	6	klf2a	0.964
8	Twitching	1	klf2a	3.2
8	Twitching	2	klf2a	1.32
8	Twitching	3	klf2a	0.889
8	Twitching	4	klf2a	8.16
8	Twitching	5	klf2a	2.42
8	Twitching	6	klf2a	2.8
9	Twitching	1	klf2a	1.61
9	Twitching	2	klf2a	0.728
9	Twitching	3	klf2a	1.88
9	Twitching	4	klf2a	1.89
9	Twitching	5	klf2a	4.56
9	Twitching	6	klf2a	7.66
10	Twitching	1	klf2a	3.39
10	Twitching	2	klf2a	2.71
10	Twitching	3	klf2a	1.49
10	Twitching	4	klf2a	2.05
10	Twitching	5	klf2a	1.33
10	Twitching	6	klf2a	0.982
10	Twitching	7	klf2a	1.92
11	Twitching	1	klf2a	2.1
11	Twitching	2	klf2a	1.25
11	Twitching	3	klf2a	1.44
11	Twitching	4	klf2a	2.84
11	Twitching	5	klf2a	2.37
11	Twitching	6	klf2a	4.38
12	Twitching	1	klf2a	1.54
12	Twitching	2	klf2a	2.59
12	Twitching	3	klf2a	2.37
12	Twitching	4	klf2a	2.87
12	Twitching	5	klf2a	2.64
12	Twitching	6	klf2a	3.46
13	Twitching	1	klf2a	1.79
13	Twitching	2	klf2a	3.8
13	Twitching	3	klf2a	0.981
13	Twitching	4	klf2a	3.02
13	Twitching	5	klf2a	0.926
13	Twitching	6	klf2a	1.05
14	Twitching	1	klf2a	4.26
14	Twitching	2	klf2a	2.79
14	Twitching	3	klf2a	7.08
14	Twitching	4	klf2a	3.59
14	Twitching	5	klf2a	3.41
14	Twitching	6	klf2a	3.14
1	Full Recovery	1	klf2a	1.6
1	Full Recovery	2	klf2a	1.56
1	Full Recovery	3	klf2a	2.55
1	Full Recovery	4	klf2a	1.38
1	Full Recovery	5	klf2a	2.34
1	Full Recovery	6	klf2a	2.67
2	Full Recovery	1	klf2a	3.76
2	Full Recovery	2	klf2a	5.01
2	Full Recovery	3	klf2a	5.07
2	Full Recovery	4	klf2a	4.84
2	Full Recovery	5	klf2a	3.7
2	Full Recovery	6	klf2a	4.1
2	Full Recovery	7	klf2a	4.12
3	Full Recovery	1	klf2a	4.16
3	Full Recovery	2	klf2a	4.46
3	Full Recovery	3	klf2a	4.18
3	Full Recovery	4	klf2a	5.92
3	Full Recovery	5	klf2a	6.58
3	Full Recovery	6	klf2a	6.78
3	Full Recovery	7	klf2a	5.08
3	Full Recovery	8	klf2a	5.18
4	Full Recovery	1	klf2a	2.85
4	Full Recovery	2	klf2a	4.13
4	Full Recovery	3	klf2a	3.96
4	Full Recovery	4	klf2a	3.29
4	Full Recovery	5	klf2a	2.83
4	Full Recovery	6	klf2a	3.73
4	Full Recovery	7	klf2a	2.93
5	Full Recovery	1	klf2a	4.42
5	Full Recovery	2	klf2a	6.63
5	Full Recovery	3	klf2a	5.04
5	Full Recovery	4	klf2a	4.87
5	Full Recovery	5	klf2a	4.33
5	Full Recovery	6	klf2a	2.61
5	Full Recovery	7	klf2a	2.55
5	Full Recovery	8	klf2a	5.3
6	Full Recovery	1	klf2a	5.08
6	Full Recovery	2	klf2a	2.85
6	Full Recovery	3	klf2a	3.77
6	Full Recovery	4	klf2a	2.78
6	Full Recovery	5	klf2a	4.3
6	Full Recovery	6	klf2a	7.01
6	Full Recovery	7	klf2a	3.9
6	Full Recovery	8	klf2a	3.69
7	Full Recovery	1	klf2a	4.14
7	Full Recovery	2	klf2a	3.42
7	Full Recovery	3	klf2a	2.77
7	Full Recovery	4	klf2a	4.31
7	Full Recovery	5	klf2a	5.04
7	Full Recovery	6	klf2a	2.12
7	Full Recovery	7	klf2a	4.2
8	Full Recovery	1	klf2a	4.89
8	Full Recovery	2	klf2a	5.53
8	Full Recovery	3	klf2a	1.85
8	Full Recovery	4	klf2a	2.11
8	Full Recovery	5	klf2a	2.61
8	Full Recovery	6	klf2a	2.01
8	Full Recovery	7	klf2a	2.75
8	Full Recovery	8	klf2a	3.39
9	Full Recovery	1	klf2a	2.98
9	Full Recovery	2	klf2a	4.96
9	Full Recovery	3	klf2a	3.78
9	Full Recovery	4	klf2a	2.3
9	Full Recovery	5	klf2a	3.2
9	Full Recovery	6	klf2a	6.72
9	Full Recovery	7	klf2a	3.63
9	Full Recovery	8	klf2a	2.8
10	Full Recovery	1	klf2a	3.3
10	Full Recovery	2	klf2a	2.79
10	Full Recovery	3	klf2a	4.77
10	Full Recovery	4	klf2a	6.53
10	Full Recovery	5	klf2a	5.59
10	Full Recovery	6	klf2a	7.8
10	Full Recovery	7	klf2a	2.86
10	Full Recovery	8	klf2a	3.36
11	Full Recovery	1	klf2a	4.04
11	Full Recovery	2	klf2a	6.8
11	Full Recovery	3	klf2a	4.12
11	Full Recovery	4	klf2a	3.26
11	Full Recovery	5	klf2a	4.41
11	Full Recovery	6	klf2a	6.03
11	Full Recovery	7	klf2a	3.51
11	Full Recovery	8	klf2a	4.57

## Sheet: mxra5b IMA enthesis measurement
Figure 5 -- figure supplement 1 source data (refer Figure 5 --figure supplement 1Z)
Dataset: Measurement of mxra5b HCR signal intensity in IMA enthesis tenocytes
Embryo	Condition	Cell	Gene	SI
1	WT	1	mxra5b	2.53
1	WT	2	mxra5b	2.57
1	WT	3	mxra5b	2.96
1	WT	4	mxra5b	1.75
1	WT	5	mxra5b	1.89
1	WT	6	mxra5b	1.55
1	WT	7	mxra5b	1.85
1	WT	8	mxra5b	1.54
2	WT	1	mxra5b	4.33
2	WT	2	mxra5b	3.27
2	WT	3	mxra5b	3.28
2	WT	4	mxra5b	3.15
2	WT	5	mxra5b	5.32
2	WT	6	mxra5b	2.48
2	WT	7	mxra5b	1.54
3	WT	1	mxra5b	3.3
3	WT	2	mxra5b	1.99
3	WT	3	mxra5b	2.68
3	WT	4	mxra5b	3.15
3	WT	5	mxra5b	2.96
3	WT	6	mxra5b	3.08
3	WT	7	mxra5b	3.47
3	WT	8	mxra5b	2.87
4	WT	1	mxra5b	2.53
4	WT	2	mxra5b	3.33
4	WT	3	mxra5b	2.59
4	WT	4	mxra5b	2.71
4	WT	5	mxra5b	3.22
4	WT	6	mxra5b	3.01
4	WT	7	mxra5b	2.27
5	WT	1	mxra5b	3.22
5	WT	2	mxra5b	2.9
5	WT	3	mxra5b	2.34
5	WT	4	mxra5b	3.46
5	WT	5	mxra5b	3.18
5	WT	6	mxra5b	2.88
5	WT	7	mxra5b	3.2
6	WT	1	mxra5b	1.25
6	WT	2	mxra5b	1.45
6	WT	3	mxra5b	1.71
6	WT	4	mxra5b	1.32
7	WT	1	mxra5b	1.41
7	WT	2	mxra5b	1.49
7	WT	3	mxra5b	1.46
7	WT	4	mxra5b	1.08
7	WT	5	mxra5b	0.892
7	WT	6	mxra5b	0.852
7	WT	7	mxra5b	1.04
1	Paralyzed	1	mxra5b	2.62
1	Paralyzed	2	mxra5b	2.09
1	Paralyzed	3	mxra5b	1.6
1	Paralyzed	4	mxra5b	1.71
1	Paralyzed	5	mxra5b	1.19
1	Paralyzed	6	mxra5b	1.24
1	Paralyzed	7	mxra5b	1.33
1	Paralyzed	8	mxra5b	0.894
2	Paralyzed	1	mxra5b	1.51
2	Paralyzed	2	mxra5b	1.66
2	Paralyzed	3	mxra5b	1.75
2	Paralyzed	4	mxra5b	1.11
2	Paralyzed	5	mxra5b	1.54
2	Paralyzed	6	mxra5b	1.21
2	Paralyzed	7	mxra5b	1.68
2	Paralyzed	8	mxra5b	1.86
3	Paralyzed	1	mxra5b	1.75
3	Paralyzed	2	mxra5b	2.1
3	Paralyzed	3	mxra5b	1.61
3	Paralyzed	4	mxra5b	1.78
3	Paralyzed	5	mxra5b	1.75
3	Paralyzed	6	mxra5b	2.25
3	Paralyzed	7	mxra5b	2.07
4	Paralyzed	1	mxra5b	3.49
4	Paralyzed	2	mxra5b	2.58
4	Paralyzed	3	mxra5b	1.89
4	Paralyzed	4	mxra5b	2.59
4	Paralyzed	5	mxra5b	1.94
4	Paralyzed	6	mxra5b	2.16
4	Paralyzed	7	mxra5b	2.44
5	Paralyzed	1	mxra5b	2.21
5	Paralyzed	2	mxra5b	2.69
5	Paralyzed	3	mxra5b	2.27
5	Paralyzed	4	mxra5b	2.07
5	Paralyzed	5	mxra5b	2.23
5	Paralyzed	6	mxra5b	2.34
5	Paralyzed	7	mxra5b	2.99
5	Paralyzed	8	mxra5b	2.21
6	Paralyzed	1	mxra5b	0.996
6	Paralyzed	2	mxra5b	1.14
6	Paralyzed	3	mxra5b	1.71
6	Paralyzed	4	mxra5b	1
6	Paralyzed	5	mxra5b	1.3
6	Paralyzed	6	mxra5b	1.16
6	Paralyzed	7	mxra5b	1.33
6	Paralyzed	8	mxra5b	0.764
7	Paralyzed	1	mxra5b	2.56
7	Paralyzed	2	mxra5b	2.14
7	Paralyzed	3	mxra5b	2.29
7	Paralyzed	4	mxra5b	1.98
7	Paralyzed	5	mxra5b	1.39
7	Paralyzed	6	mxra5b	1.44
7	Paralyzed	7	mxra5b	1.98
7	Paralyzed	8	mxra5b	2.41
8	Paralyzed	1	mxra5b	1.78
8	Paralyzed	2	mxra5b	1.8
8	Paralyzed	3	mxra5b	2.49
8	Paralyzed	4	mxra5b	1.37
8	Paralyzed	5	mxra5b	1.24
8	Paralyzed	6	mxra5b	0.822
8	Paralyzed	7	mxra5b	0.52
8	Paralyzed	8	mxra5b	1.03
1	Twitching	1	mxra5b	1.06
1	Twitching	2	mxra5b	1.31
1	Twitching	3	mxra5b	1.17
1	Twitching	4	mxra5b	1.52
1	Twitching	5	mxra5b	2.08
1	Twitching	6	mxra5b	1.94
2	Twitching	1	mxra5b	1.58
2	Twitching	2	mxra5b	1.83
2	Twitching	3	mxra5b	1.3
2	Twitching	4	mxra5b	1.61
2	Twitching	5	mxra5b	1.65
2	Twitching	6	mxra5b	1.66
3	Twitching	1	mxra5b	1.88
3	Twitching	2	mxra5b	1.5
3	Twitching	3	mxra5b	1.98
3	Twitching	4	mxra5b	1.76
3	Twitching	5	mxra5b	1.97
3	Twitching	6	mxra5b	1.7
4	Twitching	1	mxra5b	1.64
4	Twitching	2	mxra5b	1.3
4	Twitching	3	mxra5b	2.07
4	Twitching	4	mxra5b	1.82
4	Twitching	5	mxra5b	1.34
4	Twitching	6	mxra5b	1.48
4	Twitching	7	mxra5b	1.52
5	Twitching	1	mxra5b	1.46
5	Twitching	2	mxra5b	1.42
5	Twitching	3	mxra5b	1.38
5	Twitching	4	mxra5b	1.66
5	Twitching	5	mxra5b	1.94
5	Twitching	6	mxra5b	1.82
6	Twitching	1	mxra5b	2.17
6	Twitching	2	mxra5b	2.59
6	Twitching	3	mxra5b	2.41
6	Twitching	4	mxra5b	2.79
6	Twitching	5	mxra5b	2
6	Twitching	6	mxra5b	2.13
7	Twitching	1	mxra5b	1.37
7	Twitching	2	mxra5b	1.29
7	Twitching	3	mxra5b	1.08
7	Twitching	4	mxra5b	1.16
7	Twitching	5	mxra5b	1.81
7	Twitching	6	mxra5b	1.33
8	Twitching	1	mxra5b	2.53
8	Twitching	2	mxra5b	2.3
8	Twitching	3	mxra5b	3.3
8	Twitching	4	mxra5b	2.02
8	Twitching	5	mxra5b	1.96
8	Twitching	6	mxra5b	1.48
1	Full Recovery	1	mxra5b	1.45
1	Full Recovery	2	mxra5b	0.95
1	Full Recovery	3	mxra5b	1.22
1	Full Recovery	4	mxra5b	1.06
1	Full Recovery	5	mxra5b	1.6
1	Full Recovery	6	mxra5b	2.07
1	Full Recovery	7	mxra5b	1.74
1	Full Recovery	8	mxra5b	1.81
2	Full Recovery	1	mxra5b	1.74
2	Full Recovery	2	mxra5b	2.5
2	Full Recovery	3	mxra5b	2.4
2	Full Recovery	4	mxra5b	2.44
2	Full Recovery	5	mxra5b	2.41
2	Full Recovery	6	mxra5b	2.39
2	Full Recovery	7	mxra5b	2.27
2	Full Recovery	8	mxra5b	2.01
3	Full Recovery	1	mxra5b	2.13
3	Full Recovery	2	mxra5b	1.92
3	Full Recovery	3	mxra5b	1.8
3	Full Recovery	4	mxra5b	2.17
3	Full Recovery	5	mxra5b	1.92
3	Full Recovery	6	mxra5b	2.24
3	Full Recovery	7	mxra5b	2.43
3	Full Recovery	8	mxra5b	2.68
4	Full Recovery	1	mxra5b	1.43
4	Full Recovery	2	mxra5b	1.74
4	Full Recovery	3	mxra5b	1.54
4	Full Recovery	4	mxra5b	1.7
4	Full Recovery	5	mxra5b	1.72
4	Full Recovery	6	mxra5b	1.63
4	Full Recovery	7	mxra5b	1.74
4	Full Recovery	8	mxra5b	1.31
