# Supplementary material for: Transcriptome profiling of tendon fibroblasts at the onset of embryonic muscle contraction reveals novel force-responsive genes
Source: eLife. 2025 Mar 27;14:e105802. doi: 10.7554/eLife.105802 (PMC12040314; doi:10.7554/eLife.105802)
Supplement: Figure 5—figure supplement 2—source data 1. [file elife-105802-fig5-figsupp2-data1.xlsx]

## Sheet: mxra5b MHJ MTJ measurements
Figure 5 -- figure supplement 2 source data (refer Figure 5 --figure supplement 2M)
Dataset: Measurement of mxra5b HCR signal intensity in MHJ myotendinous junction tenocytes
Embryo	Condition	Cell	Gene	SI
1	WT	1	mxra5b	25.8
1	WT	2	mxra5b	10.3
1	WT	3	mxra5b	7.43
1	WT	4	mxra5b	19.5
1	WT	5	mxra5b	11.1
1	WT	6	mxra5b	10.5
1	WT	7	mxra5b	16.9
2	WT	1	mxra5b	20
2	WT	2	mxra5b	14
2	WT	3	mxra5b	19.6
2	WT	4	mxra5b	28.3
2	WT	5	mxra5b	12.7
2	WT	6	mxra5b	11
2	WT	7	mxra5b	15.1
3	WT	1	mxra5b	17.3
3	WT	2	mxra5b	16.9
3	WT	3	mxra5b	17.1
3	WT	4	mxra5b	15.7
3	WT	5	mxra5b	15.6
3	WT	6	mxra5b	16.2
3	WT	7	mxra5b	11.4
4	WT	1	mxra5b	16.3
4	WT	2	mxra5b	13.6
4	WT	3	mxra5b	15.8
4	WT	4	mxra5b	7.74
4	WT	5	mxra5b	8.46
4	WT	6	mxra5b	11.9
5	WT	1	mxra5b	28.9
5	WT	2	mxra5b	23.1
5	WT	3	mxra5b	18.8
5	WT	4	mxra5b	24.5
5	WT	5	mxra5b	22.8
5	WT	6	mxra5b	20.2
5	WT	7	mxra5b	24.7
5	WT	8	mxra5b	19.6
6	WT	1	mxra5b	3.36
6	WT	2	mxra5b	3.51
6	WT	3	mxra5b	3.36
6	WT	4	mxra5b	3.22
6	WT	5	mxra5b	4.38
7	WT	1	mxra5b	2.82
7	WT	2	mxra5b	2.19
7	WT	3	mxra5b	4.45
7	WT	4	mxra5b	2.93
7	WT	5	mxra5b	2.38
7	WT	6	mxra5b	1.62
7	WT	7	mxra5b	2.5
7	WT	8	mxra5b	2.3
1	Paralyzed	1	mxra5b	10
1	Paralyzed	2	mxra5b	4.65
1	Paralyzed	3	mxra5b	6.2
1	Paralyzed	4	mxra5b	7.16
2	Paralyzed	1	mxra5b	6.71
2	Paralyzed	2	mxra5b	7.35
2	Paralyzed	3	mxra5b	8.66
2	Paralyzed	4	mxra5b	5.62
2	Paralyzed	5	mxra5b	12.3
2	Paralyzed	6	mxra5b	4.06
2	Paralyzed	7	mxra5b	5.17
2	Paralyzed	8	mxra5b	5.6
2	Paralyzed	9	mxra5b	6.21
2	Paralyzed	10	mxra5b	3.46
3	Paralyzed	1	mxra5b	7.84
3	Paralyzed	2	mxra5b	4.55
3	Paralyzed	3	mxra5b	4.65
3	Paralyzed	4	mxra5b	8.15
3	Paralyzed	5	mxra5b	5.81
3	Paralyzed	6	mxra5b	9.38
3	Paralyzed	7	mxra5b	6.75
3	Paralyzed	8	mxra5b	5.22
3	Paralyzed	9	mxra5b	5.24
3	Paralyzed	10	mxra5b	6.78
3	Paralyzed	11	mxra5b	5.11
4	Paralyzed	1	mxra5b	4.71
4	Paralyzed	2	mxra5b	7.55
4	Paralyzed	3	mxra5b	2.48
4	Paralyzed	4	mxra5b	3.96
4	Paralyzed	5	mxra5b	9.67
4	Paralyzed	6	mxra5b	6.76
4	Paralyzed	7	mxra5b	3.89
4	Paralyzed	8	mxra5b	3.07
4	Paralyzed	9	mxra5b	8.17
5	Paralyzed	1	mxra5b	14.2
5	Paralyzed	2	mxra5b	13.8
5	Paralyzed	3	mxra5b	10.1
5	Paralyzed	4	mxra5b	8.64
5	Paralyzed	5	mxra5b	21.1
5	Paralyzed	6	mxra5b	4.87
6	Paralyzed	1	mxra5b	3.12
6	Paralyzed	2	mxra5b	2.46
6	Paralyzed	3	mxra5b	3.41
6	Paralyzed	4	mxra5b	1.7
6	Paralyzed	5	mxra5b	1.97
6	Paralyzed	6	mxra5b	2.19
6	Paralyzed	7	mxra5b	2.48
7	Paralyzed	1	mxra5b	2.26
7	Paralyzed	2	mxra5b	3.26
7	Paralyzed	3	mxra5b	5.84
7	Paralyzed	4	mxra5b	2.05
7	Paralyzed	5	mxra5b	4.59
7	Paralyzed	6	mxra5b	3.82
7	Paralyzed	7	mxra5b	12
7	Paralyzed	8	mxra5b	5.15
7	Paralyzed	9	mxra5b	4.67
8	Paralyzed	1	mxra5b	4.77
8	Paralyzed	2	mxra5b	4.36
8	Paralyzed	3	mxra5b	4.43
8	Paralyzed	4	mxra5b	5.2
8	Paralyzed	5	mxra5b	5.89
8	Paralyzed	6	mxra5b	4.17
1	Twitching	1	mxra5b	4.82
1	Twitching	2	mxra5b	6.17
1	Twitching	3	mxra5b	4.75
1	Twitching	4	mxra5b	7.35
1	Twitching	5	mxra5b	3.25
1	Twitching	6	mxra5b	3.17
1	Twitching	7	mxra5b	1.63
1	Twitching	8	mxra5b	3.26
1	Twitching	9	mxra5b	2.67
1	Twitching	10	mxra5b	6.23
2	Twitching	1	mxra5b	4.54
2	Twitching	2	mxra5b	5.17
2	Twitching	3	mxra5b	11.6
2	Twitching	4	mxra5b	12
2	Twitching	5	mxra5b	5.44
2	Twitching	6	mxra5b	6.9
2	Twitching	7	mxra5b	8.61
3	Twitching	1	mxra5b	6.34
3	Twitching	2	mxra5b	4.1
3	Twitching	3	mxra5b	6.64
3	Twitching	4	mxra5b	6.09
3	Twitching	5	mxra5b	8.77
3	Twitching	6	mxra5b	2.71
3	Twitching	7	mxra5b	13.1
3	Twitching	8	mxra5b	10.6
4	Twitching	1	mxra5b	10.4
4	Twitching	2	mxra5b	9.86
4	Twitching	3	mxra5b	6.74
4	Twitching	4	mxra5b	8.12
4	Twitching	5	mxra5b	6.46
4	Twitching	6	mxra5b	9.18
4	Twitching	7	mxra5b	8.48
4	Twitching	8	mxra5b	6.37
4	Twitching	9	mxra5b	2.88
4	Twitching	10	mxra5b	3.11
5	Twitching	1	mxra5b	5.82
5	Twitching	2	mxra5b	8.35
5	Twitching	3	mxra5b	4.67
5	Twitching	4	mxra5b	11.9
5	Twitching	5	mxra5b	5.09
5	Twitching	6	mxra5b	2.37
5	Twitching	7	mxra5b	4.92
5	Twitching	8	mxra5b	4.08
5	Twitching	9	mxra5b	2.72
5	Twitching	10	mxra5b	4.62
6	Twitching	1	mxra5b	3.25
6	Twitching	2	mxra5b	3.49
6	Twitching	3	mxra5b	4.17
6	Twitching	4	mxra5b	4.67
6	Twitching	5	mxra5b	3.35
6	Twitching	6	mxra5b	4.29
6	Twitching	7	mxra5b	2.16
6	Twitching	8	mxra5b	4.02
6	Twitching	9	mxra5b	4.91
6	Twitching	10	mxra5b	3.79
6	Twitching	11	mxra5b	6.86
6	Twitching	12	mxra5b	5.87
6	Twitching	13	mxra5b	7.32
6	Twitching	14	mxra5b	3.02
7	Twitching	1	mxra5b	4.36
7	Twitching	2	mxra5b	3.19
7	Twitching	3	mxra5b	2.81
7	Twitching	4	mxra5b	5.27
7	Twitching	5	mxra5b	4.91
7	Twitching	6	mxra5b	3.73
7	Twitching	7	mxra5b	6.44
7	Twitching	8	mxra5b	2.87
7	Twitching	9	mxra5b	4.28
8	Twitching	1	mxra5b	6.33
8	Twitching	2	mxra5b	6.4
8	Twitching	3	mxra5b	4.91
8	Twitching	4	mxra5b	7.62
8	Twitching	5	mxra5b	5.87
8	Twitching	6	mxra5b	2.96
8	Twitching	7	mxra5b	2.49
8	Twitching	8	mxra5b	6.19
8	Twitching	9	mxra5b	7.97
8	Twitching	10	mxra5b	3.12
1	Full Recovery	1	mxra5b	10.1
1	Full Recovery	2	mxra5b	11.8
1	Full Recovery	3	mxra5b	3.03
1	Full Recovery	4	mxra5b	14.8
1	Full Recovery	5	mxra5b	9.11
1	Full Recovery	6	mxra5b	14.5
1	Full Recovery	7	mxra5b	6.24
1	Full Recovery	8	mxra5b	2.16
1	Full Recovery	9	mxra5b	6.49
1	Full Recovery	10	mxra5b	6.04
2	Full Recovery	1	mxra5b	13.2
2	Full Recovery	2	mxra5b	25.6
2	Full Recovery	3	mxra5b	18
2	Full Recovery	4	mxra5b	7.93
2	Full Recovery	5	mxra5b	9.85
2	Full Recovery	6	mxra5b	5.14
2	Full Recovery	7	mxra5b	11
2	Full Recovery	8	mxra5b	5.56
2	Full Recovery	9	mxra5b	20
3	Full Recovery	1	mxra5b	8.17
3	Full Recovery	2	mxra5b	13.5
3	Full Recovery	3	mxra5b	18.1
3	Full Recovery	4	mxra5b	9.2
3	Full Recovery	5	mxra5b	14.6
3	Full Recovery	6	mxra5b	19
3	Full Recovery	7	mxra5b	19.5
3	Full Recovery	8	mxra5b	6.82
3	Full Recovery	9	mxra5b	5.34
3	Full Recovery	10	mxra5b	10
4	Full Recovery	1	mxra5b	18.2
4	Full Recovery	2	mxra5b	13.4
4	Full Recovery	3	mxra5b	15.4
4	Full Recovery	4	mxra5b	6.08
4	Full Recovery	5	mxra5b	12
4	Full Recovery	6	mxra5b	12
4	Full Recovery	7	mxra5b	21.4
4	Full Recovery	8	mxra5b	3.83
