# Supplementary material for: Transcriptome profiling of tendon fibroblasts at the onset of embryonic muscle contraction reveals novel force-responsive genes
Source: eLife. 2025 Mar 27;14:e105802. doi: 10.7554/eLife.105802 (PMC12040314; doi:10.7554/eLife.105802)
Supplement: Figure 5—figure supplement 3—source data 1. [file elife-105802-fig5-figsupp3-data1.xlsx]

## Sheet: mxra5b SHT MTJ measurements
Figure 5--figure supplement 3 source data (refer Figure 5--figure supplement 3M)
Dataset: Measurement of mxra5b HCR signal intensity in SHT MTJ tenocytes
1	WT	1	mxra5b	3.06
1	WT	2	mxra5b	5.49
1	WT	3	mxra5b	3.78
1	WT	4	mxra5b	5.9
2	WT	1	mxra5b	2.51
2	WT	2	mxra5b	6.59
2	WT	3	mxra5b	5.95
2	WT	4	mxra5b	4.91
3	WT	1	mxra5b	8.09
3	WT	2	mxra5b	4.77
3	WT	3	mxra5b	3.95
3	WT	4	mxra5b	8.3
4	WT	1	mxra5b	3.7
4	WT	2	mxra5b	2.62
4	WT	3	mxra5b	3.55
5	WT	1	mxra5b	5.22
5	WT	2	mxra5b	3.77
5	WT	3	mxra5b	4.43
5	WT	4	mxra5b	9.49
6	WT	1	mxra5b	1.03
6	WT	2	mxra5b	1.26
6	WT	3	mxra5b	0.895
6	WT	4	mxra5b	1.21
7	WT	1	mxra5b	1.77
7	WT	2	mxra5b	1.12
7	WT	3	mxra5b	1.28
1	Paralyzed	1	mxra5b	3.19
1	Paralyzed	2	mxra5b	3.1
1	Paralyzed	3	mxra5b	3.94
1	Paralyzed	4	mxra5b	3.01
2	Paralyzed	1	mxra5b	4.21
2	Paralyzed	2	mxra5b	3.54
2	Paralyzed	3	mxra5b	3.38
2	Paralyzed	4	mxra5b	3
3	Paralyzed	1	mxra5b	1.68
3	Paralyzed	2	mxra5b	1.6
3	Paralyzed	3	mxra5b	3.56
4	Paralyzed	1	mxra5b	3.1
4	Paralyzed	2	mxra5b	4.47
4	Paralyzed	3	mxra5b	2.61
4	Paralyzed	4	mxra5b	6.38
5	Paralyzed	1	mxra5b	1.73
5	Paralyzed	2	mxra5b	1.72
5	Paralyzed	3	mxra5b	1.42
5	Paralyzed	4	mxra5b	1.32
6	Paralyzed	1	mxra5b	1.31
6	Paralyzed	2	mxra5b	1.12
6	Paralyzed	3	mxra5b	0.837
6	Paralyzed	4	mxra5b	1.34
7	Paralyzed	1	mxra5b	3.1
7	Paralyzed	2	mxra5b	2.47
7	Paralyzed	3	mxra5b	1.63
7	Paralyzed	4	mxra5b	1.6
8	Paralyzed	1	mxra5b	2.15
8	Paralyzed	2	mxra5b	2.89
8	Paralyzed	3	mxra5b	4.32
8	Paralyzed	4	mxra5b	6.22
1	Twitching	1	mxra5b	3.58
1	Twitching	2	mxra5b	1.94
1	Twitching	3	mxra5b	1.69
1	Twitching	4	mxra5b	2.84
2	Twitching	1	mxra5b	1.78
2	Twitching	2	mxra5b	1.45
2	Twitching	3	mxra5b	2.42
2	Twitching	4	mxra5b	1.9
3	Twitching	1	mxra5b	1.79
3	Twitching	2	mxra5b	2.12
3	Twitching	3	mxra5b	2.57
3	Twitching	4	mxra5b	4.72
4	Twitching	1	mxra5b	4
4	Twitching	2	mxra5b	2.93
4	Twitching	3	mxra5b	2.44
4	Twitching	4	mxra5b	5.93
5	Twitching	1	mxra5b	1.91
5	Twitching	2	mxra5b	1.45
5	Twitching	3	mxra5b	1.43
5	Twitching	4	mxra5b	2.91
6	Twitching	1	mxra5b	3.24
6	Twitching	2	mxra5b	2.34
6	Twitching	3	mxra5b	2.09
6	Twitching	4	mxra5b	2.26
6	Twitching	5	mxra5b	3.87
7	Twitching	1	mxra5b	1.68
7	Twitching	2	mxra5b	1.44
7	Twitching	3	mxra5b	1.56
7	Twitching	4	mxra5b	2.07
7	Twitching	5	mxra5b	2.6
7	Twitching	6	mxra5b	1.46
8	Twitching	1	mxra5b	2.33
8	Twitching	2	mxra5b	2.18
8	Twitching	3	mxra5b	1.96
8	Twitching	4	mxra5b	2.47
1	Full Recovery	1	mxra5b	2.05
1	Full Recovery	2	mxra5b	2.3
1	Full Recovery	3	mxra5b	2.57
1	Full Recovery	4	mxra5b	3.53
2	Full Recovery	1	mxra5b	5.72
2	Full Recovery	2	mxra5b	2.02
2	Full Recovery	3	mxra5b	5.39
2	Full Recovery	4	mxra5b	3.69
3	Full Recovery	1	mxra5b	3.45
3	Full Recovery	2	mxra5b	10.4
3	Full Recovery	3	mxra5b	10.1
3	Full Recovery	4	mxra5b	4.45
4	Full Recovery	1	mxra5b	3.38
4	Full Recovery	2	mxra5b	3.78
4	Full Recovery	3	mxra5b	5.3
4	Full Recovery	4	mxra5b	5.88

## Sheet: klf2a SHT MTJ measurements
Figure 5--figure supplement 3 source data (refer Figure 5--figure supplement 3Z)
Dataset: Measurement of mxra5b HCR signal intensity in SHT MTJ tenocytes
Embryo	Condition	Cell	Gene	SI
1	WT	1	klf2a	1.36
1	WT	2	klf2a	3.04
1	WT	3	klf2a	1.28
1	WT	4	klf2a	1.31
2	WT	1	klf2a	2
2	WT	2	klf2a	2.6
2	WT	3	klf2a	3.97
2	WT	4	klf2a	1.24
3	WT	1	klf2a	2.18
3	WT	2	klf2a	14.1
3	WT	3	klf2a	2.44
3	WT	4	klf2a	3.08
4	WT	1	klf2a	2.15
4	WT	2	klf2a	2.05
4	WT	3	klf2a	3.08
5	WT	1	klf2a	1.7
5	WT	2	klf2a	1.13
5	WT	3	klf2a	0.948
5	WT	4	klf2a	2.72
6	WT	1	klf2a	0.678
6	WT	2	klf2a	1.33
6	WT	3	klf2a	0.896
6	WT	4	klf2a	1.22
7	WT	1	klf2a	1.99
7	WT	2	klf2a	2.97
7	WT	3	klf2a	2.06
8	WT	1	klf2a	0.744
8	WT	2	klf2a	0.0915
8	WT	3	klf2a	0.641
8	WT	4	klf2a	1.53
9	WT	1	klf2a	0.724
9	WT	2	klf2a	1.05
9	WT	3	klf2a	1.06
9	WT	4	klf2a	0.89
10	WT	1	klf2a	1
10	WT	2	klf2a	0.959
10	WT	3	klf2a	1.32
11	WT	1	klf2a	1.19
11	WT	2	klf2a	0.726
11	WT	3	klf2a	1.46
11	WT	4	klf2a	1.82
12	WT	1	klf2a	0.724
12	WT	2	klf2a	0.448
12	WT	3	klf2a	0.993
12	WT	4	klf2a	1.2
13	WT	1	klf2a	0.729
13	WT	2	klf2a	0.74
13	WT	3	klf2a	0.753
14	WT	1	klf2a	0.874
14	WT	2	klf2a	0.703
14	WT	3	klf2a	0.777
14	WT	4	klf2a	0.572
15	WT	1	klf2a	1.2
15	WT	2	klf2a	0.867
15	WT	3	klf2a	1.16
1	Paralyzed	1	klf2a	1.58
1	Paralyzed	2	klf2a	2.73
1	Paralyzed	3	klf2a	2.27
1	Paralyzed	4	klf2a	2.72
2	Paralyzed	1	klf2a	2.96
2	Paralyzed	2	klf2a	2.09
2	Paralyzed	3	klf2a	1.91
2	Paralyzed	4	klf2a	3.11
3	Paralyzed	1	klf2a	1.8
3	Paralyzed	2	klf2a	1.35
3	Paralyzed	3	klf2a	1.53
4	Paralyzed	1	klf2a	1.52
4	Paralyzed	2	klf2a	2.51
4	Paralyzed	3	klf2a	1.85
4	Paralyzed	4	klf2a	2.23
5	Paralyzed	1	klf2a	3.36
5	Paralyzed	2	klf2a	2.06
5	Paralyzed	3	klf2a	1.69
5	Paralyzed	4	klf2a	2.16
6	Paralyzed	1	klf2a	1.18
6	Paralyzed	2	klf2a	0.839
6	Paralyzed	3	klf2a	0.567
6	Paralyzed	4	klf2a	0.838
7	Paralyzed	1	klf2a	1.5
7	Paralyzed	2	klf2a	1.92
7	Paralyzed	3	klf2a	2.16
7	Paralyzed	4	klf2a	3.07
8	Paralyzed	1	klf2a	1.06
8	Paralyzed	2	klf2a	1.66
8	Paralyzed	3	klf2a	1.89
8	Paralyzed	4	klf2a	2.58
9	Paralyzed	1	klf2a	0.901
10	Paralyzed	1	klf2a	0.77
10	Paralyzed	2	klf2a	1.15
10	Paralyzed	3	klf2a	1.45
11	Paralyzed	1	klf2a	1.4
11	Paralyzed	2	klf2a	2.23
12	Paralyzed	1	klf2a	1.37
12	Paralyzed	2	klf2a	1.39
12	Paralyzed	3	klf2a	1.43
13	Paralyzed	1	klf2a	0.84
13	Paralyzed	2	klf2a	1.36
13	Paralyzed	3	klf2a	1.17
13	Paralyzed	4	klf2a	0.929
14	Paralyzed	1	klf2a	0.84
14	Paralyzed	2	klf2a	1.36
14	Paralyzed	3	klf2a	1.17
14	Paralyzed	4	klf2a	0.929
15	Paralyzed	1	klf2a	0.437
15	Paralyzed	2	klf2a	0.442
15	Paralyzed	3	klf2a	0.933
15	Paralyzed	4	klf2a	1.09
16	Paralyzed	1	klf2a	0.985
16	Paralyzed	2	klf2a	1.37
16	Paralyzed	3	klf2a	4.47
16	Paralyzed	4	klf2a	0.848
1	Twitching	1	klf2a	0.899
1	Twitching	2	klf2a	0.905
1	Twitching	3	klf2a	2.21
1	Twitching	4	klf2a	1.45
2	Twitching	1	klf2a	1.04
2	Twitching	2	klf2a	1.66
2	Twitching	3	klf2a	1.34
2	Twitching	4	klf2a	1.25
3	Twitching	1	klf2a	1.92
3	Twitching	2	klf2a	1.85
3	Twitching	3	klf2a	1.67
3	Twitching	4	klf2a	1.16
4	Twitching	1	klf2a	1.73
4	Twitching	2	klf2a	1.12
4	Twitching	3	klf2a	1.02
4	Twitching	4	klf2a	3.42
5	Twitching	1	klf2a	0.942
5	Twitching	2	klf2a	0.624
5	Twitching	3	klf2a	0.493
5	Twitching	4	klf2a	0.736
6	Twitching	1	klf2a	3.94
6	Twitching	2	klf2a	2.37
6	Twitching	3	klf2a	1.53
6	Twitching	4	klf2a	1.79
6	Twitching	5	klf2a	1.27
7	Twitching	1	klf2a	1.47
7	Twitching	2	klf2a	0.746
7	Twitching	3	klf2a	2.05
7	Twitching	4	klf2a	0.95
7	Twitching	5	klf2a	0.992
7	Twitching	6	klf2a	2.08
8	Twitching	1	klf2a	1.22
8	Twitching	2	klf2a	0.922
8	Twitching	3	klf2a	1.01
8	Twitching	4	klf2a	0.904
9	Twitching	1	klf2a	0.724
9	Twitching	2	klf2a	0.662
9	Twitching	3	klf2a	1.09
9	Twitching	4	klf2a	1.02
9	Twitching	5	klf2a	0.923
10	Twitching	1	klf2a	0.703
10	Twitching	2	klf2a	0.969
10	Twitching	3	klf2a	7.78
10	Twitching	4	klf2a	1.27
10	Twitching	5	klf2a	1.19
10	Twitching	6	klf2a	1.16
11	Twitching	1	klf2a	0.659
11	Twitching	2	klf2a	1.1
11	Twitching	3	klf2a	1.33
11	Twitching	4	klf2a	1.26
12	Twitching	1	klf2a	0.49
12	Twitching	2	klf2a	0.359
12	Twitching	3	klf2a	0.605
12	Twitching	4	klf2a	0.485
13	Twitching	1	klf2a	2.13
13	Twitching	2	klf2a	2.25
13	Twitching	3	klf2a	0.754
13	Twitching	4	klf2a	0.701
14	Twitching	1	klf2a	0.763
14	Twitching	2	klf2a	0.893
14	Twitching	3	klf2a	0.903
14	Twitching	4	klf2a	0.797
1	Full Recovery	1	klf2a	2.03
1	Full Recovery	2	klf2a	0.909
1	Full Recovery	3	klf2a	1.5
1	Full Recovery	4	klf2a	1.59
2	Full Recovery	1	klf2a	2.07
2	Full Recovery	2	klf2a	2.01
2	Full Recovery	3	klf2a	3.82
2	Full Recovery	4	klf2a	1.55
3	Full Recovery	1	klf2a	2.81
3	Full Recovery	2	klf2a	3.58
3	Full Recovery	3	klf2a	3.33
3	Full Recovery	4	klf2a	2.09
4	Full Recovery	1	klf2a	3.29
4	Full Recovery	2	klf2a	2.59
4	Full Recovery	3	klf2a	8.33
4	Full Recovery	4	klf2a	7.68
5	Full Recovery	1	klf2a	1.87
5	Full Recovery	2	klf2a	4.01
5	Full Recovery	3	klf2a	3.47
5	Full Recovery	4	klf2a	3.05
6	Full Recovery	1	klf2a	1.22
6	Full Recovery	2	klf2a	1.76
6	Full Recovery	3	klf2a	1.98
7	Full Recovery	1	klf2a	1.62
7	Full Recovery	2	klf2a	2.21
7	Full Recovery	3	klf2a	1.76
8	Full Recovery	1	klf2a	1.06
8	Full Recovery	2	klf2a	1.5
8	Full Recovery	3	klf2a	1.25
8	Full Recovery	4	klf2a	1.2
9	Full Recovery	1	klf2a	0.988
9	Full Recovery	2	klf2a	1.7
9	Full Recovery	3	klf2a	0.495
9	Full Recovery	4	klf2a	1.65
10	Full Recovery	4	klf2a	1.27
10	Full Recovery	2	klf2a	1.27
10	Full Recovery	3	klf2a	1.98
11	Full Recovery	1	klf2a	1.15
11	Full Recovery	2	klf2a	1.05
11	Full Recovery	3	klf2a	1.15
11	Full Recovery	4	klf2a	0.767
