# Supplementary material for: Transcriptome profiling of tendon fibroblasts at the onset of embryonic muscle contraction reveals novel force-responsive genes
Source: eLife. 2025 Mar 27;14:e105802. doi: 10.7554/eLife.105802 (PMC12040314; doi:10.7554/eLife.105802)
Supplement: Figure 5—source data 1. [file elife-105802-fig5-data1.xlsx]

## Sheet: mxra5b SHT enthesis measurement
Figure 5 - source data (refer Figure 5U)
Dataset: Measurement of mxra5b HCR signal intensity in SHT enthesis tenocytes
Embryo	Condition	Cell	Gene	SI
1	WT	1	mxra5b	1.6
1	WT	2	mxra5b	2.23
1	WT	3	mxra5b	2.31
1	WT	4	mxra5b	2.13
1	WT	5	mxra5b	7.42
1	WT	6	mxra5b	6.9
1	WT	7	mxra5b	6.19
2	WT	1	mxra5b	2
2	WT	2	mxra5b	2.17
2	WT	3	mxra5b	1.55
2	WT	4	mxra5b	2.65
2	WT	5	mxra5b	1.63
2	WT	6	mxra5b	2.08
3	WT	1	mxra5b	1.84
3	WT	2	mxra5b	2.17
3	WT	3	mxra5b	1.7
3	WT	4	mxra5b	2.12
3	WT	5	mxra5b	1.81
3	WT	6	mxra5b	3.67
3	WT	7	mxra5b	4.11
3	WT	8	mxra5b	5.82
4	WT	1	mxra5b	1.45
4	WT	2	mxra5b	1.84
4	WT	3	mxra5b	3.07
4	WT	4	mxra5b	2.27
4	WT	5	mxra5b	1.18
4	WT	6	mxra5b	1.24
5	WT	1	mxra5b	1.85
5	WT	2	mxra5b	1.39
5	WT	3	mxra5b	1.71
5	WT	4	mxra5b	2.23
5	WT	5	mxra5b	1.58
5	WT	6	mxra5b	1.79
5	WT	7	mxra5b	2.43
5	WT	8	mxra5b	2.35
6	WT	1	mxra5b	1.22
6	WT	2	mxra5b	1.17
6	WT	3	mxra5b	1.05
6	WT	4	mxra5b	1.31
6	WT	5	mxra5b	1.33
7	WT	1	mxra5b	0.562
7	WT	2	mxra5b	0.639
7	WT	3	mxra5b	0.711
7	WT	4	mxra5b	0.503
7	WT	5	mxra5b	0.862
7	WT	6	mxra5b	0.459
1	Paralyzed	1	mxra5b	1.47
1	Paralyzed	2	mxra5b	1.16
1	Paralyzed	3	mxra5b	0.867
1	Paralyzed	4	mxra5b	1.6
1	Paralyzed	5	mxra5b	1.22
1	Paralyzed	6	mxra5b	1.52
1	Paralyzed	7	mxra5b	1.03
2	Paralyzed	1	mxra5b	2.56
2	Paralyzed	2	mxra5b	1.25
2	Paralyzed	3	mxra5b	1.68
2	Paralyzed	4	mxra5b	0.996
2	Paralyzed	5	mxra5b	1.42
2	Paralyzed	6	mxra5b	1.11
3	Paralyzed	1	mxra5b	1.04
3	Paralyzed	2	mxra5b	0.702
3	Paralyzed	3	mxra5b	1.23
3	Paralyzed	4	mxra5b	1.58
3	Paralyzed	5	mxra5b	2.11
3	Paralyzed	6	mxra5b	1.2
3	Paralyzed	7	mxra5b	1.88
3	Paralyzed	8	mxra5b	2.04
4	Paralyzed	1	mxra5b	1.65
4	Paralyzed	2	mxra5b	1.39
4	Paralyzed	3	mxra5b	1.13
4	Paralyzed	4	mxra5b	1.13
4	Paralyzed	5	mxra5b	1.4
4	Paralyzed	6	mxra5b	1.29
4	Paralyzed	7	mxra5b	1.21
5	Paralyzed	1	mxra5b	1.38
5	Paralyzed	2	mxra5b	1.3
5	Paralyzed	3	mxra5b	1.33
5	Paralyzed	4	mxra5b	1.43
5	Paralyzed	5	mxra5b	1.12
5	Paralyzed	6	mxra5b	1.37
6	Paralyzed	1	mxra5b	1.13
6	Paralyzed	2	mxra5b	1.12
6	Paralyzed	3	mxra5b	1.97
6	Paralyzed	4	mxra5b	1.05
6	Paralyzed	5	mxra5b	1.48
6	Paralyzed	6	mxra5b	1.3
7	Paralyzed	1	mxra5b	1.2
7	Paralyzed	2	mxra5b	1.14
7	Paralyzed	3	mxra5b	1.15
7	Paralyzed	4	mxra5b	1.59
7	Paralyzed	5	mxra5b	1.29
8	Paralyzed	1	mxra5b	1.11
8	Paralyzed	2	mxra5b	1.31
8	Paralyzed	3	mxra5b	1.75
8	Paralyzed	4	mxra5b	1.43
8	Paralyzed	5	mxra5b	1.49
8	Paralyzed	6	mxra5b	1.43
8	Paralyzed	7	mxra5b	1.54
8	Paralyzed	8	mxra5b	2.01
1	Twitching	1	mxra5b	1.05
1	Twitching	2	mxra5b	1.13
1	Twitching	3	mxra5b	1.59
1	Twitching	4	mxra5b	1.19
1	Twitching	5	mxra5b	1.23
1	Twitching	6	mxra5b	1.35
1	Twitching	7	mxra5b	2.43
1	Twitching	8	mxra5b	4.42
2	Twitching	1	mxra5b	1.26
2	Twitching	2	mxra5b	0.99
2	Twitching	3	mxra5b	0.786
2	Twitching	4	mxra5b	1.06
2	Twitching	5	mxra5b	1.01
3	Twitching	1	mxra5b	0.917
3	Twitching	2	mxra5b	0.769
3	Twitching	3	mxra5b	1.12
3	Twitching	4	mxra5b	0.826
3	Twitching	5	mxra5b	0.709
4	Twitching	1	mxra5b	1.36
4	Twitching	2	mxra5b	1.28
4	Twitching	3	mxra5b	1.53
4	Twitching	4	mxra5b	1.55
4	Twitching	5	mxra5b	2.01
5	Twitching	1	mxra5b	1.03
5	Twitching	2	mxra5b	1.25
5	Twitching	3	mxra5b	1.31
5	Twitching	4	mxra5b	0.618
5	Twitching	5	mxra5b	1.6
6	Twitching	1	mxra5b	1.33
6	Twitching	2	mxra5b	1.24
6	Twitching	3	mxra5b	1.94
6	Twitching	4	mxra5b	0.933
6	Twitching	5	mxra5b	0.968
6	Twitching	6	mxra5b	3.11
6	Twitching	7	mxra5b	2.86
7	Twitching	1	mxra5b	1.25
7	Twitching	2	mxra5b	1.11
7	Twitching	3	mxra5b	1.03
7	Twitching	4	mxra5b	0.905
7	Twitching	5	mxra5b	0.934
7	Twitching	6	mxra5b	1.04
7	Twitching	7	mxra5b	0.826
7	Twitching	8	mxra5b	1.92
8	Twitching	1	mxra5b	0.902
8	Twitching	2	mxra5b	1.34
8	Twitching	3	mxra5b	0.52
1	Full Recovery	1	mxra5b	1.28
1	Full Recovery	2	mxra5b	1.23
1	Full Recovery	3	mxra5b	1.6
1	Full Recovery	4	mxra5b	1.14
1	Full Recovery	5	mxra5b	1.13
1	Full Recovery	6	mxra5b	1.84
1	Full Recovery	7	mxra5b	1.43
1	Full Recovery	8	mxra5b	0.921
1	Full Recovery	9	mxra5b	2.51
2	Full Recovery	1	mxra5b	0.911
2	Full Recovery	2	mxra5b	2.34
2	Full Recovery	3	mxra5b	1.86
2	Full Recovery	4	mxra5b	1.52
2	Full Recovery	5	mxra5b	2.86
2	Full Recovery	6	mxra5b	2.58
2	Full Recovery	7	mxra5b	3
3	Full Recovery	1	mxra5b	1.46
3	Full Recovery	2	mxra5b	1.09
3	Full Recovery	3	mxra5b	1.88
3	Full Recovery	4	mxra5b	1.09
3	Full Recovery	5	mxra5b	1.46
3	Full Recovery	6	mxra5b	3.8
3	Full Recovery	7	mxra5b	5.08
3	Full Recovery	8	mxra5b	6.34
4	Full Recovery	1	mxra5b	1.14
4	Full Recovery	2	mxra5b	1.2
4	Full Recovery	3	mxra5b	1.63
4	Full Recovery	4	mxra5b	1.13
4	Full Recovery	5	mxra5b	2.65
4	Full Recovery	6	mxra5b	1.21
4	Full Recovery	7	mxra5b	7.08
4	Full Recovery	8	mxra5b	4.18
