# Supplementary material for: Transcriptome profiling of tendon fibroblasts at the onset of embryonic muscle contraction reveals novel force-responsive genes
Source: eLife. 2025 Mar 27;14:e105802. doi: 10.7554/eLife.105802 (PMC12040314; doi:10.7554/eLife.105802)
Supplement: Figure 6—source data 1. [file elife-105802-fig6-data1.xlsx]

## Sheet: klf2a MHJ MTJ measurements
Figure 6 source data (refer Figure 6U)
Dataset: Measurement of klf2a HCR signal intensity in MHJ MTJ tenocytes
Embryo	Condition	Cell	Gene	SI
1	WT	1	klf2a	1.1
1	WT	2	klf2a	1.1
1	WT	3	klf2a	0.958
1	WT	4	klf2a	1.66
1	WT	5	klf2a	0.938
1	WT	6	klf2a	1.31
1	WT	7	klf2a	2.41
2	WT	1	klf2a	1.91
2	WT	2	klf2a	1.5
2	WT	3	klf2a	1.71
2	WT	4	klf2a	2.07
2	WT	5	klf2a	1.34
2	WT	6	klf2a	1.94
2	WT	7	klf2a	1.95
3	WT	1	klf2a	2.26
3	WT	2	klf2a	2.13
3	WT	3	klf2a	2.23
3	WT	4	klf2a	1.57
3	WT	5	klf2a	3.26
3	WT	6	klf2a	1.1
3	WT	7	klf2a	1.66
4	WT	1	klf2a	1.85
4	WT	2	klf2a	1.18
4	WT	3	klf2a	1.1
4	WT	4	klf2a	1.74
4	WT	5	klf2a	1.82
4	WT	6	klf2a	1.17
5	WT	1	klf2a	1.76
5	WT	2	klf2a	1.68
5	WT	3	klf2a	1.12
5	WT	4	klf2a	1.05
5	WT	5	klf2a	1.64
5	WT	6	klf2a	1.42
5	WT	7	klf2a	1.59
5	WT	8	klf2a	1.41
6	WT	1	klf2a	0.703
6	WT	2	klf2a	0.723
6	WT	3	klf2a	0.903
6	WT	4	klf2a	0.612
6	WT	5	klf2a	0.669
7	WT	1	klf2a	0.581
7	WT	2	klf2a	0.698
7	WT	3	klf2a	0.804
7	WT	4	klf2a	0.652
7	WT	5	klf2a	0.645
7	WT	6	klf2a	0.463
7	WT	7	klf2a	0.674
7	WT	8	klf2a	0.439
8	WT	1	klf2a	0.692
8	WT	2	klf2a	0.792
8	WT	3	klf2a	0.819
8	WT	4	klf2a	0.924
8	WT	5	klf2a	1.28
8	WT	6	klf2a	0.765
8	WT	7	klf2a	0.505
8	WT	8	klf2a	0.585
8	WT	9	klf2a	1
9	WT	1	klf2a	0.936
9	WT	2	klf2a	0.755
9	WT	3	klf2a	0.941
9	WT	4	klf2a	0.748
9	WT	5	klf2a	0.8333
9	WT	6	klf2a	0.972
10	WT	1	klf2a	0.84
10	WT	2	klf2a	0.632
10	WT	3	klf2a	0.874
10	WT	4	klf2a	0.654
10	WT	5	klf2a	0.729
10	WT	6	klf2a	0.557
11	WT	1	klf2a	1.01
11	WT	2	klf2a	0.98
11	WT	3	klf2a	0.899
11	WT	4	klf2a	1.29
11	WT	5	klf2a	0.819
13	WT	1	klf2a	0.549
13	WT	2	klf2a	0.672
13	WT	3	klf2a	0.803
13	WT	4	klf2a	0.7
13	WT	5	klf2a	0.963
13	WT	6	klf2a	0.908
13	WT	7	klf2a	0.482
13	WT	8	klf2a	0.671
15	WT	1	klf2a	0.677
15	WT	2	klf2a	0.616
15	WT	3	klf2a	0.589
15	WT	4	klf2a	0.859
15	WT	5	klf2a	0.913
15	WT	6	klf2a	0.725
15	WT	7	klf2a	0.651
16	WT	1	klf2a	0.33
16	WT	2	klf2a	0.456
16	WT	3	klf2a	0.674
16	WT	4	klf2a	0.78
16	WT	5	klf2a	0.992
16	WT	6	klf2a	0.639
16	WT	7	klf2a	0.663
17	WT	1	klf2a	0.946
17	WT	2	klf2a	0.846
17	WT	3	klf2a	0.902
17	WT	4	klf2a	0.901
17	WT	5	klf2a	1.24
17	WT	6	klf2a	0.89
17	WT	7	klf2a	1.03
1	Paralyzed	1	klf2a	3.22
1	Paralyzed	2	klf2a	3.32
1	Paralyzed	3	klf2a	3.38
1	Paralyzed	4	klf2a	3.02
2	Paralyzed	1	klf2a	4.07
2	Paralyzed	2	klf2a	2.5
2	Paralyzed	3	klf2a	3.24
2	Paralyzed	4	klf2a	3.69
2	Paralyzed	5	klf2a	3.33
2	Paralyzed	6	klf2a	3.01
2	Paralyzed	7	klf2a	3.02
2	Paralyzed	8	klf2a	1.95
2	Paralyzed	9	klf2a	5.08
2	Paralyzed	10	klf2a	3.43
3	Paralyzed	1	klf2a	2.12
3	Paralyzed	2	klf2a	2.47
3	Paralyzed	3	klf2a	1.73
3	Paralyzed	4	klf2a	2.32
3	Paralyzed	5	klf2a	1.99
3	Paralyzed	6	klf2a	2.78
3	Paralyzed	7	klf2a	2.44
3	Paralyzed	8	klf2a	1.72
3	Paralyzed	9	klf2a	1.45
3	Paralyzed	10	klf2a	1.95
3	Paralyzed	11	klf2a	1.9
4	Paralyzed	1	klf2a	1.69
4	Paralyzed	2	klf2a	1.82
4	Paralyzed	3	klf2a	1.11
4	Paralyzed	4	klf2a	0.674
4	Paralyzed	5	klf2a	1.79
4	Paralyzed	6	klf2a	1.19
4	Paralyzed	7	klf2a	1.65
4	Paralyzed	8	klf2a	2.39
4	Paralyzed	9	klf2a	1.95
5	Paralyzed	1	klf2a	3.36
5	Paralyzed	2	klf2a	2.23
5	Paralyzed	3	klf2a	2.51
5	Paralyzed	4	klf2a	2.35
5	Paralyzed	5	klf2a	2.84
5	Paralyzed	6	klf2a	2.33
6	Paralyzed	1	klf2a	1.26
6	Paralyzed	2	klf2a	1.26
6	Paralyzed	3	klf2a	1.14
6	Paralyzed	4	klf2a	0.95
6	Paralyzed	5	klf2a	0.982
6	Paralyzed	6	klf2a	0.732
6	Paralyzed	7	klf2a	1.11
7	Paralyzed	1	klf2a	2.32
7	Paralyzed	2	klf2a	1.59
7	Paralyzed	3	klf2a	2.29
7	Paralyzed	4	klf2a	1.18
7	Paralyzed	5	klf2a	1.36
7	Paralyzed	6	klf2a	1.49
7	Paralyzed	7	klf2a	3.07
7	Paralyzed	8	klf2a	2.02
7	Paralyzed	9	klf2a	1.7
8	Paralyzed	1	klf2a	0.857
8	Paralyzed	2	klf2a	1.34
8	Paralyzed	3	klf2a	1.04
8	Paralyzed	4	klf2a	1.97
8	Paralyzed	5	klf2a	1.59
8	Paralyzed	6	klf2a	1.5
9	Paralyzed	1	klf2a	1.61
9	Paralyzed	2	klf2a	1.71
9	Paralyzed	3	klf2a	1.26
9	Paralyzed	4	klf2a	1.61
9	Paralyzed	5	klf2a	1.43
10	Paralyzed	1	klf2a	0.745
10	Paralyzed	2	klf2a	2.24
10	Paralyzed	3	klf2a	0.95
10	Paralyzed	4	klf2a	0.721
10	Paralyzed	5	klf2a	1.41
10	Paralyzed	6	klf2a	0.31
10	Paralyzed	7	klf2a	0.247
10	Paralyzed	8	klf2a	0.537
10	Paralyzed	9	klf2a	0.635
10	Paralyzed	10	klf2a	0.402
11	Paralyzed	1	klf2a	1.24
11	Paralyzed	2	klf2a	1.79
12	Paralyzed	1	klf2a	0.532
12	Paralyzed	2	klf2a	0.724
12	Paralyzed	3	klf2a	1.27
12	Paralyzed	4	klf2a	1.36
12	Paralyzed	5	klf2a	1.23
12	Paralyzed	6	klf2a	1.61
12	Paralyzed	7	klf2a	1.05
13	Paralyzed	1	klf2a	1.91
13	Paralyzed	2	klf2a	1.67
13	Paralyzed	3	klf2a	1.46
13	Paralyzed	4	klf2a	1.78
13	Paralyzed	5	klf2a	1.29
13	Paralyzed	6	klf2a	1.06
13	Paralyzed	7	klf2a	1.08
13	Paralyzed	8	klf2a	1.18
13	Paralyzed	9	klf2a	1.51
14	Paralyzed	1	klf2a	0.816
14	Paralyzed	2	klf2a	1.11
14	Paralyzed	3	klf2a	1.37
14	Paralyzed	4	klf2a	1.48
14	Paralyzed	5	klf2a	1.4
14	Paralyzed	6	klf2a	2.09
15	Paralyzed	1	klf2a	1.25
15	Paralyzed	2	klf2a	0.714
15	Paralyzed	3	klf2a	1.72
15	Paralyzed	4	klf2a	2.59
15	Paralyzed	5	klf2a	1.27
15	Paralyzed	6	klf2a	0.793
15	Paralyzed	7	klf2a	1.24
15	Paralyzed	8	klf2a	0.55
15	Paralyzed	9	klf2a	1.24
15	Paralyzed	10	klf2a	1.1
15	Paralyzed	11	klf2a	1.14
15	Paralyzed	12	klf2a	1.42
1	Twitching	1	klf2a	1.41
1	Twitching	2	klf2a	1.07
1	Twitching	3	klf2a	1.44
1	Twitching	4	klf2a	1.11
1	Twitching	5	klf2a	0.923
1	Twitching	6	klf2a	1.02
1	Twitching	7	klf2a	0.92
1	Twitching	8	klf2a	0.741
1	Twitching	9	klf2a	2.54
1	Twitching	10	klf2a	1.96
2	Twitching	1	klf2a	1.22
2	Twitching	2	klf2a	1.47
2	Twitching	3	klf2a	1.4
2	Twitching	4	klf2a	2.83
2	Twitching	5	klf2a	1.16
2	Twitching	6	klf2a	1.56
2	Twitching	7	klf2a	2.06
3	Twitching	1	klf2a	1.89
3	Twitching	2	klf2a	0.864
3	Twitching	3	klf2a	2.18
3	Twitching	4	klf2a	1.51
3	Twitching	5	klf2a	2.24
3	Twitching	6	klf2a	0.698
3	Twitching	7	klf2a	1.13
3	Twitching	8	klf2a	2.01
4	Twitching	1	klf2a	1.63
4	Twitching	2	klf2a	1.49
4	Twitching	3	klf2a	2.26
4	Twitching	4	klf2a	0.982
4	Twitching	5	klf2a	0.911
4	Twitching	6	klf2a	0.82
4	Twitching	7	klf2a	1.04
4	Twitching	8	klf2a	1.07
4	Twitching	9	klf2a	0.766
4	Twitching	10	klf2a	0.802
5	Twitching	1	klf2a	1.19
5	Twitching	2	klf2a	0.964
5	Twitching	3	klf2a	0.644
5	Twitching	4	klf2a	0.74
5	Twitching	5	klf2a	1.57
5	Twitching	6	klf2a	0.905
5	Twitching	7	klf2a	1.94
5	Twitching	8	klf2a	1.24
5	Twitching	9	klf2a	1.23
5	Twitching	10	klf2a	1.48
6	Twitching	1	klf2a	1.77
6	Twitching	2	klf2a	1.39
6	Twitching	3	klf2a	1.47
6	Twitching	4	klf2a	1.74
6	Twitching	5	klf2a	1.18
6	Twitching	6	klf2a	1.38
6	Twitching	7	klf2a	0.668
6	Twitching	8	klf2a	2.62
6	Twitching	9	klf2a	1.03
6	Twitching	10	klf2a	1.3
6	Twitching	11	klf2a	2.11
6	Twitching	12	klf2a	1.45
6	Twitching	13	klf2a	2.04
6	Twitching	14	klf2a	2.33
7	Twitching	1	klf2a	0.798
7	Twitching	2	klf2a	0.94
7	Twitching	3	klf2a	0.92
7	Twitching	4	klf2a	1.36
7	Twitching	5	klf2a	1.47
7	Twitching	6	klf2a	0.767
7	Twitching	7	klf2a	1.16
7	Twitching	8	klf2a	1.12
7	Twitching	9	klf2a	0.666
8	Twitching	1	klf2a	2.21
8	Twitching	2	klf2a	2.56
8	Twitching	3	klf2a	2.12
8	Twitching	4	klf2a	1.48
8	Twitching	5	klf2a	1.93
8	Twitching	6	klf2a	1.06
8	Twitching	7	klf2a	1.25
8	Twitching	8	klf2a	2.02
8	Twitching	9	klf2a	0.728
8	Twitching	10	klf2a	1.14
9	Twitching	1	klf2a	0.805
9	Twitching	2	klf2a	0.415
9	Twitching	3	klf2a	0.844
9	Twitching	4	klf2a	0.71
9	Twitching	5	klf2a	0.805
9	Twitching	6	klf2a	0.718
9	Twitching	7	klf2a	0.748
9	Twitching	8	klf2a	0.846
9	Twitching	9	klf2a	1.37
9	Twitching	10	klf2a	2.44
9	Twitching	11	klf2a	3.16
9	Twitching	12	klf2a	0.835
10	Twitching	1	klf2a	1.22
10	Twitching	2	klf2a	1.45
10	Twitching	3	klf2a	1.37
10	Twitching	4	klf2a	1.09
10	Twitching	5	klf2a	1.62
10	Twitching	6	klf2a	1.26
10	Twitching	7	klf2a	0.93
11	Twitching	1	klf2a	0.779
11	Twitching	2	klf2a	0.822
11	Twitching	3	klf2a	0.638
11	Twitching	4	klf2a	0.856
11	Twitching	5	klf2a	0.571
11	Twitching	6	klf2a	0.644
12	Twitching	1	klf2a	0.585
12	Twitching	2	klf2a	1.12
12	Twitching	3	klf2a	0.679
12	Twitching	4	klf2a	0.892
12	Twitching	5	klf2a	0.374
13	Twitching	1	klf2a	0.656
13	Twitching	2	klf2a	0.663
13	Twitching	3	klf2a	0.528
13	Twitching	4	klf2a	0.679
13	Twitching	5	klf2a	0.424
13	Twitching	6	klf2a	0.465
13	Twitching	7	klf2a	0.472
13	Twitching	8	klf2a	0.499
13	Twitching	9	klf2a	0.491
14	Twitching	1	klf2a	1.48
14	Twitching	2	klf2a	1.16
14	Twitching	3	klf2a	1.28
14	Twitching	4	klf2a	0.438
14	Twitching	5	klf2a	0.74
14	Twitching	6	klf2a	1.02
14	Twitching	7	klf2a	1.22
14	Twitching	8	klf2a	1.21
14	Twitching	9	klf2a	0.88
14	Twitching	10	klf2a	1.63
1	Full Recovery	1	klf2a	1.25
1	Full Recovery	2	klf2a	1.69
1	Full Recovery	3	klf2a	1.7
1	Full Recovery	4	klf2a	1.75
1	Full Recovery	5	klf2a	1.27
1	Full Recovery	6	klf2a	3.07
1	Full Recovery	7	klf2a	2.27
1	Full Recovery	8	klf2a	1.92
1	Full Recovery	9	klf2a	2.6
1	Full Recovery	10	klf2a	1.26
2	Full Recovery	1	klf2a	0.947
2	Full Recovery	2	klf2a	2.19
2	Full Recovery	3	klf2a	2.16
2	Full Recovery	4	klf2a	2.52
2	Full Recovery	5	klf2a	4.2
2	Full Recovery	6	klf2a	2.82
2	Full Recovery	7	klf2a	3.15
2	Full Recovery	8	klf2a	2.47
2	Full Recovery	9	klf2a	3.13
3	Full Recovery	1	klf2a	2.26
3	Full Recovery	2	klf2a	1.95
3	Full Recovery	3	klf2a	3.43
3	Full Recovery	4	klf2a	4.19
3	Full Recovery	5	klf2a	4.36
3	Full Recovery	6	klf2a	1.37
3	Full Recovery	7	klf2a	2.85
3	Full Recovery	8	klf2a	2.75
3	Full Recovery	9	klf2a	1.92
3	Full Recovery	10	klf2a	0.875
4	Full Recovery	1	klf2a	2.13
4	Full Recovery	2	klf2a	1.93
4	Full Recovery	3	klf2a	1.76
4	Full Recovery	4	klf2a	1.75
4	Full Recovery	5	klf2a	1.69
4	Full Recovery	6	klf2a	1.89
4	Full Recovery	7	klf2a	2.47
4	Full Recovery	8	klf2a	0.8333
5	Full Recovery	1	klf2a	2.21
5	Full Recovery	2	klf2a	3.05
5	Full Recovery	3	klf2a	1.28
5	Full Recovery	4	klf2a	1.68
5	Full Recovery	5	klf2a	1.63
5	Full Recovery	6	klf2a	2.74
5	Full Recovery	7	klf2a	2.29
5	Full Recovery	8	klf2a	1.88
5	Full Recovery	9	klf2a	2.89
6	Full Recovery	1	klf2a	1.35
6	Full Recovery	2	klf2a	1.59
6	Full Recovery	3	klf2a	3.1
6	Full Recovery	4	klf2a	2.92
6	Full Recovery	5	klf2a	1.81
6	Full Recovery	6	klf2a	1.49
6	Full Recovery	7	klf2a	1.66
6	Full Recovery	8	klf2a	1.43
7	Full Recovery	1	klf2a	1.31
7	Full Recovery	2	klf2a	2.43
7	Full Recovery	3	klf2a	1.93
7	Full Recovery	4	klf2a	2.2
7	Full Recovery	5	klf2a	2.32
7	Full Recovery	6	klf2a	2.67
7	Full Recovery	7	klf2a	1.99
7	Full Recovery	8	klf2a	3.72
7	Full Recovery	9	klf2a	5.61
7	Full Recovery	10	klf2a	1.59
8	Full Recovery	1	klf2a	2.39
8	Full Recovery	2	klf2a	5.48
8	Full Recovery	3	klf2a	1.08
8	Full Recovery	4	klf2a	1.52
8	Full Recovery	5	klf2a	2.14
8	Full Recovery	6	klf2a	1.28
8	Full Recovery	7	klf2a	3.84
9	Full Recovery	1	klf2a	1.31
9	Full Recovery	2	klf2a	2.4
9	Full Recovery	3	klf2a	1.54
9	Full Recovery	4	klf2a	0.979
9	Full Recovery	5	klf2a	0.799
9	Full Recovery	6	klf2a	2.34
9	Full Recovery	7	klf2a	1.17
9	Full Recovery	8	klf2a	1.87
9	Full Recovery	9	klf2a	2.12
9	Full Recovery	10	klf2a	1.05
10	Full Recovery	1	klf2a	1.2
10	Full Recovery	2	klf2a	1.94
10	Full Recovery	3	klf2a	1.59
10	Full Recovery	4	klf2a	1.83
10	Full Recovery	5	klf2a	0.98
10	Full Recovery	6	klf2a	2.03
10	Full Recovery	7	klf2a	3.7
10	Full Recovery	8	klf2a	1.98
11	Full Recovery	1	klf2a	1.58
11	Full Recovery	2	klf2a	1.63
11	Full Recovery	3	klf2a	0.708
11	Full Recovery	4	klf2a	1.73
11	Full Recovery	5	klf2a	1.93
11	Full Recovery	6	klf2a	1.78
11	Full Recovery	7	klf2a	2.81
11	Full Recovery	8	klf2a	1.51
