# Supplementary figures and images for: Transcriptome profiling of tendon fibroblasts at the onset of embryonic muscle contraction reveals novel force-responsive genes
Source: eLife journal article supplement (doi:10.7554/elife.105802), 2025-03-27

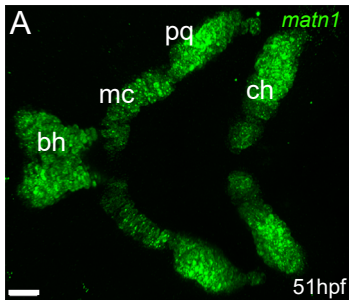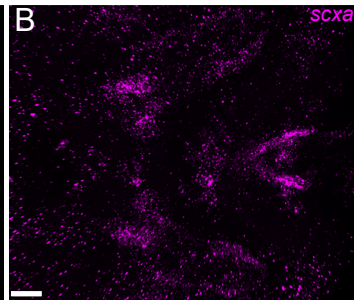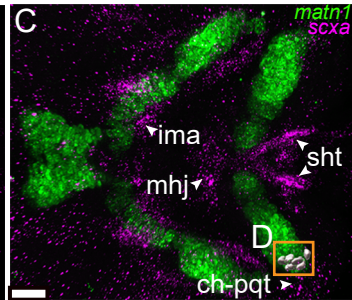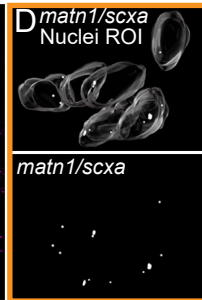

Supplement: supp [file elife-105802-supp-v1.zip]

***mxra5b***

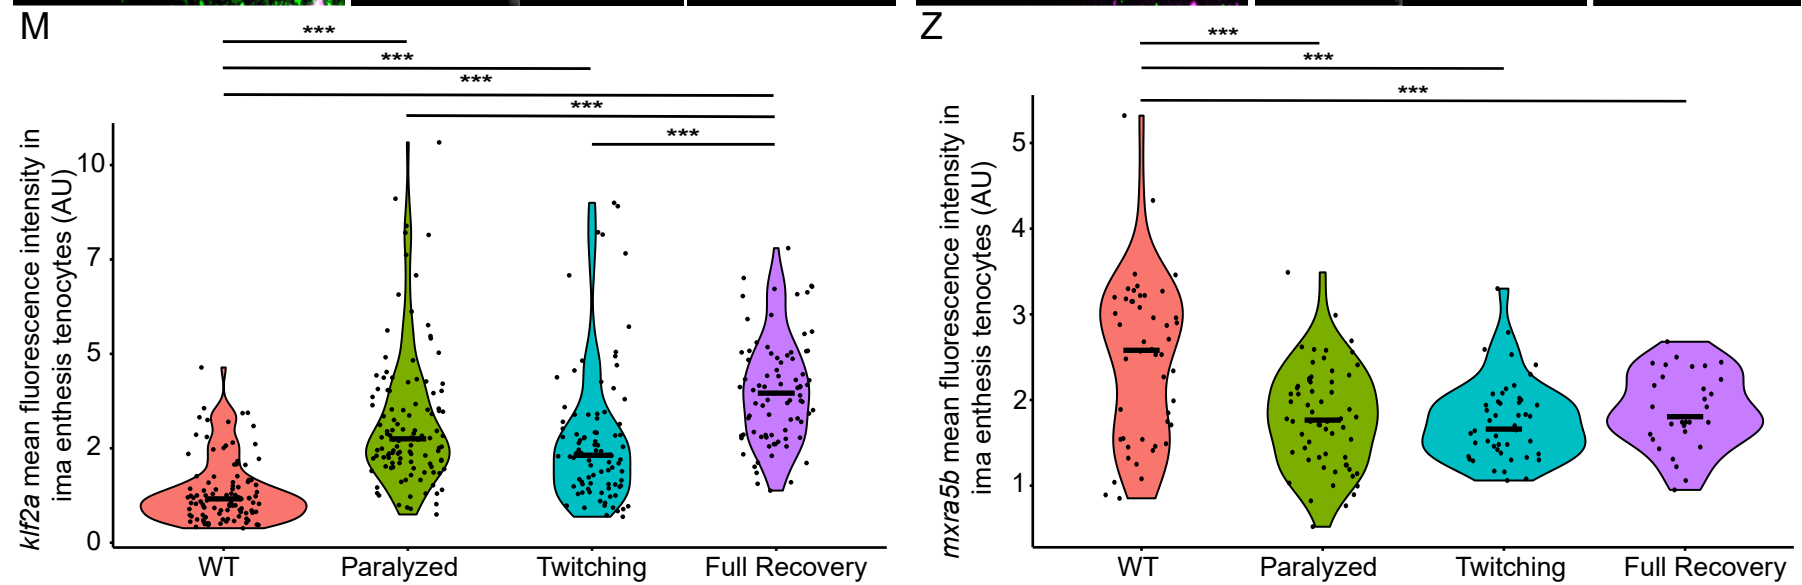

Supplement: supp [file elife-105802-supp-v1.zip]

A

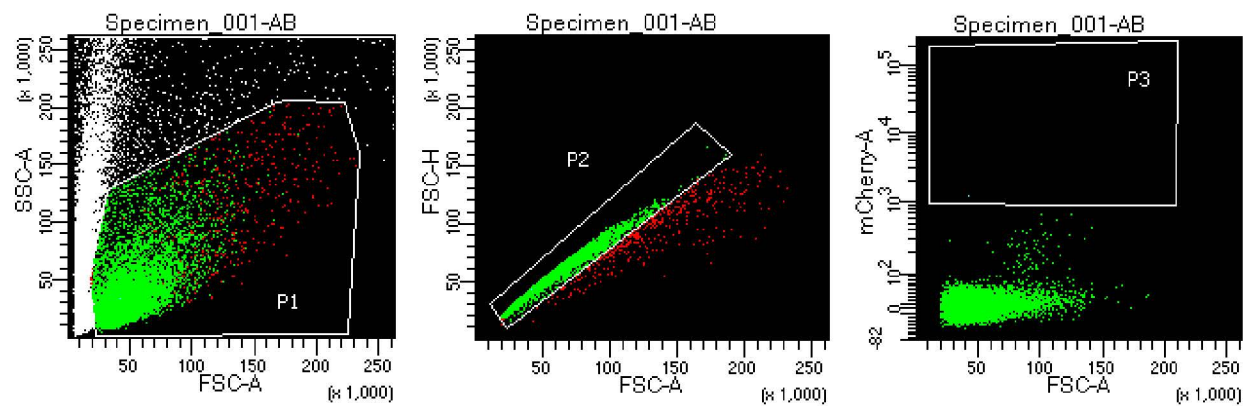

B

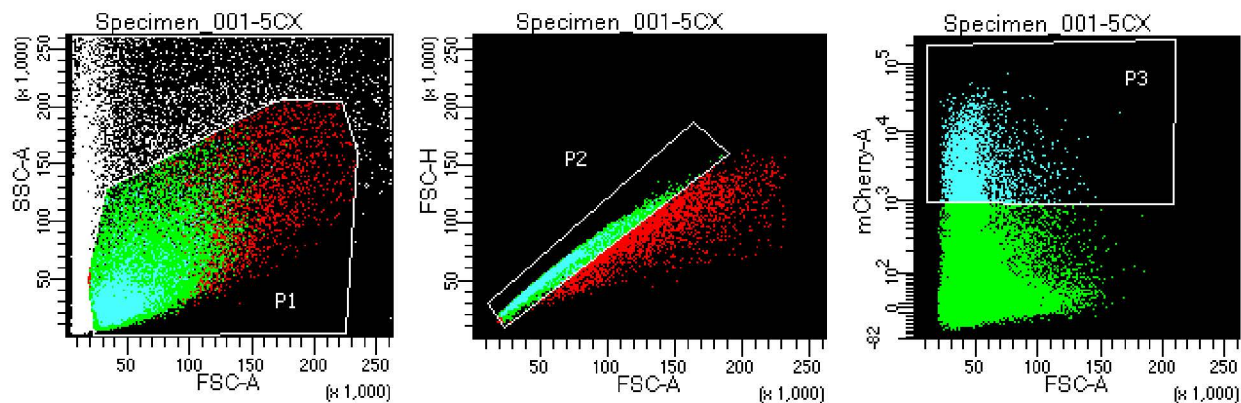

Supplement: supp [file elife-105802-supp-v1.zip]

***matn1***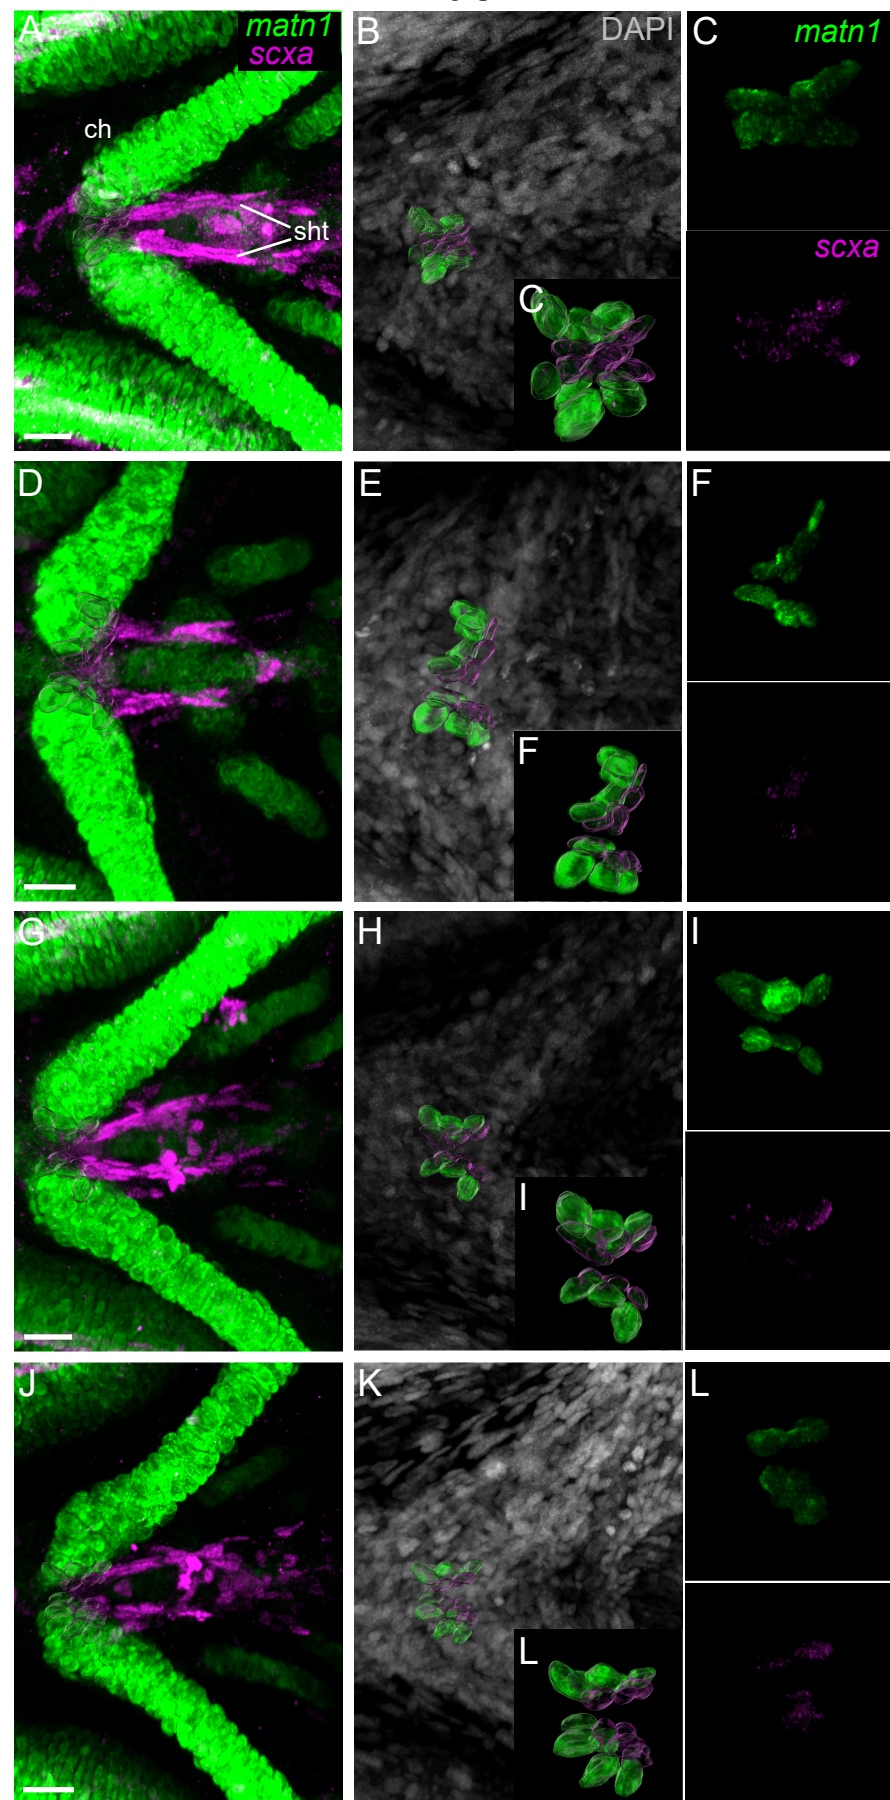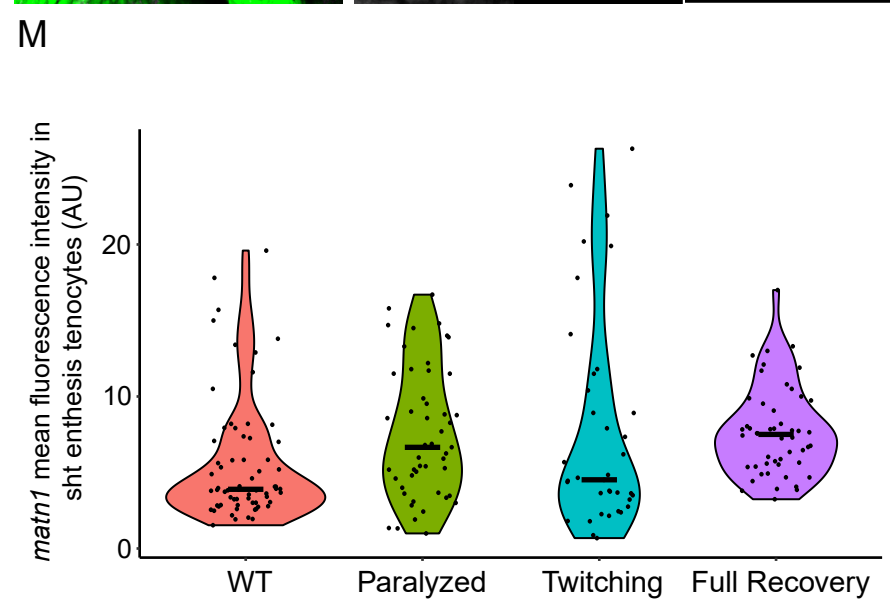***klf2a***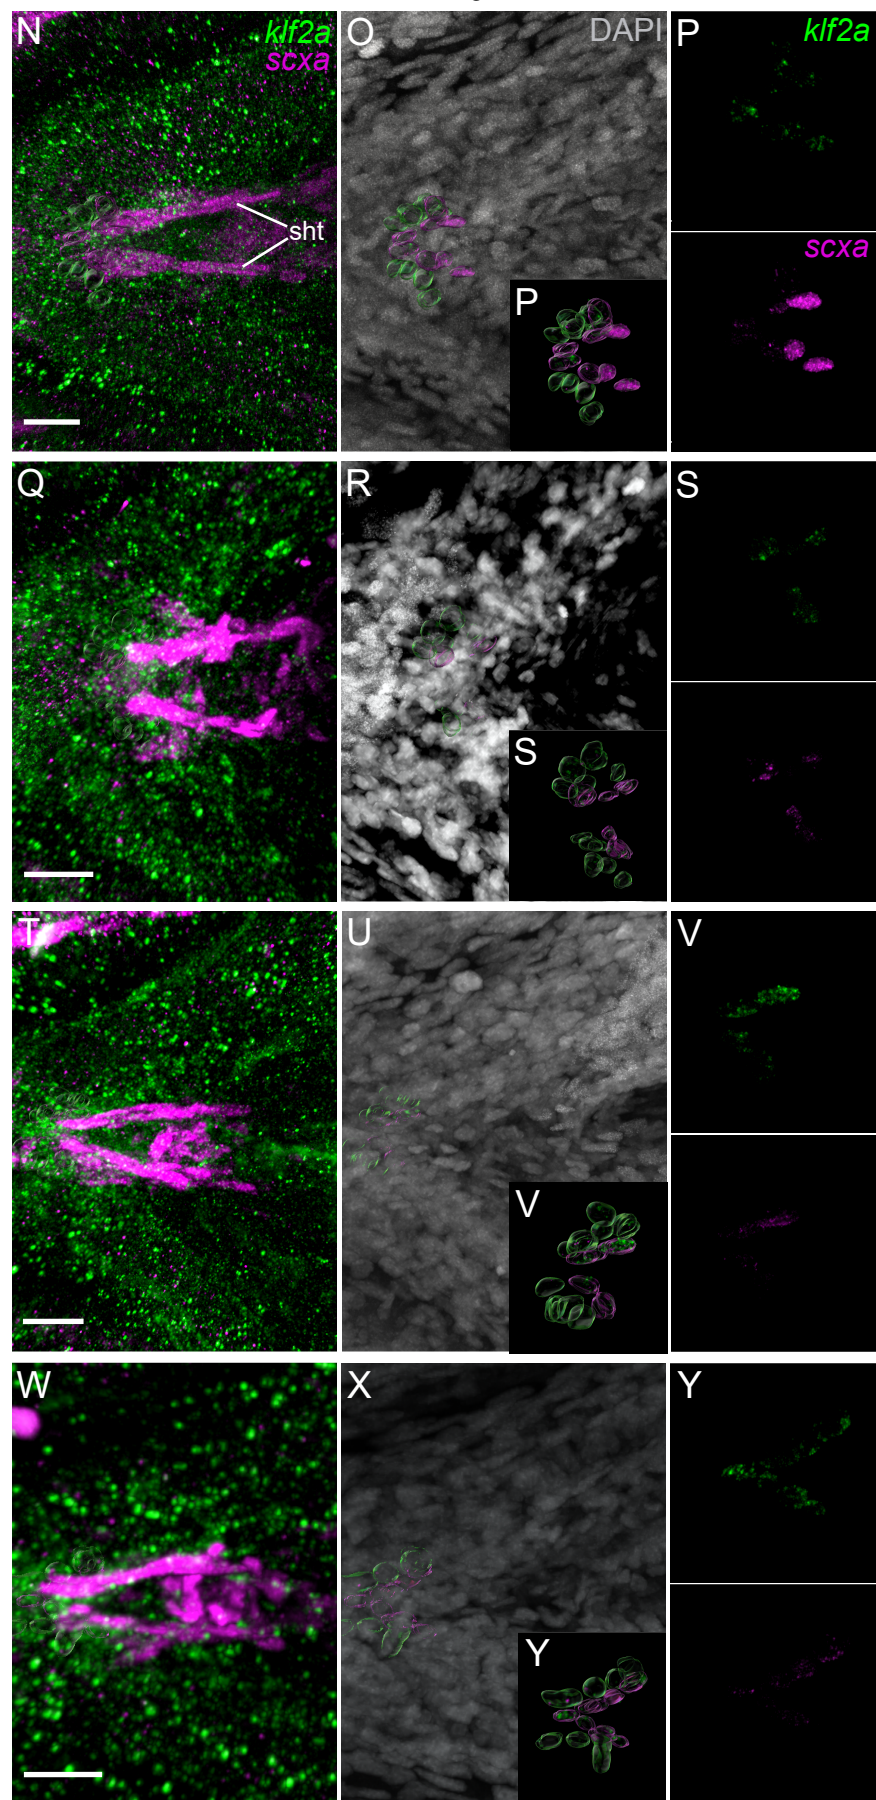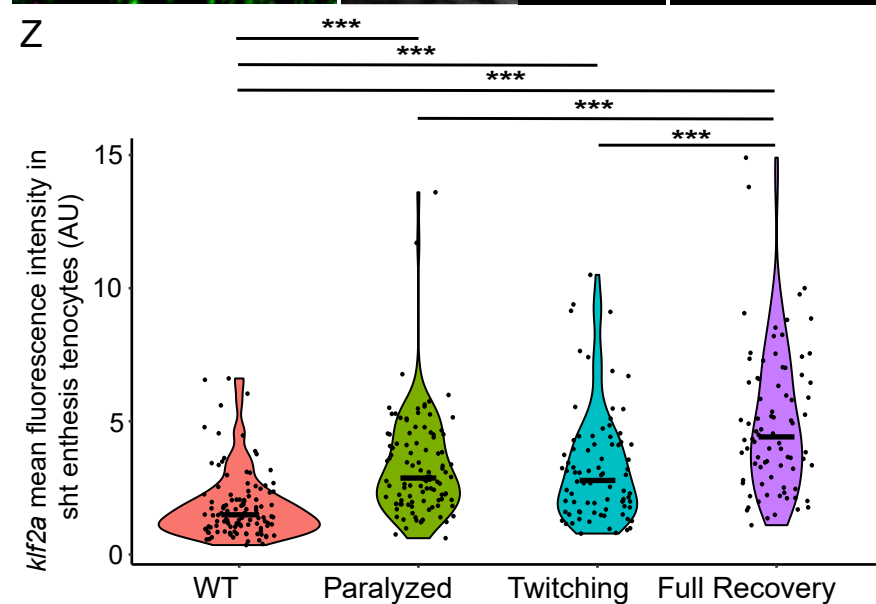

Supplement: supp [file elife-105802-supp-v1.zip]

# *mxra5b*

# *klf2a*

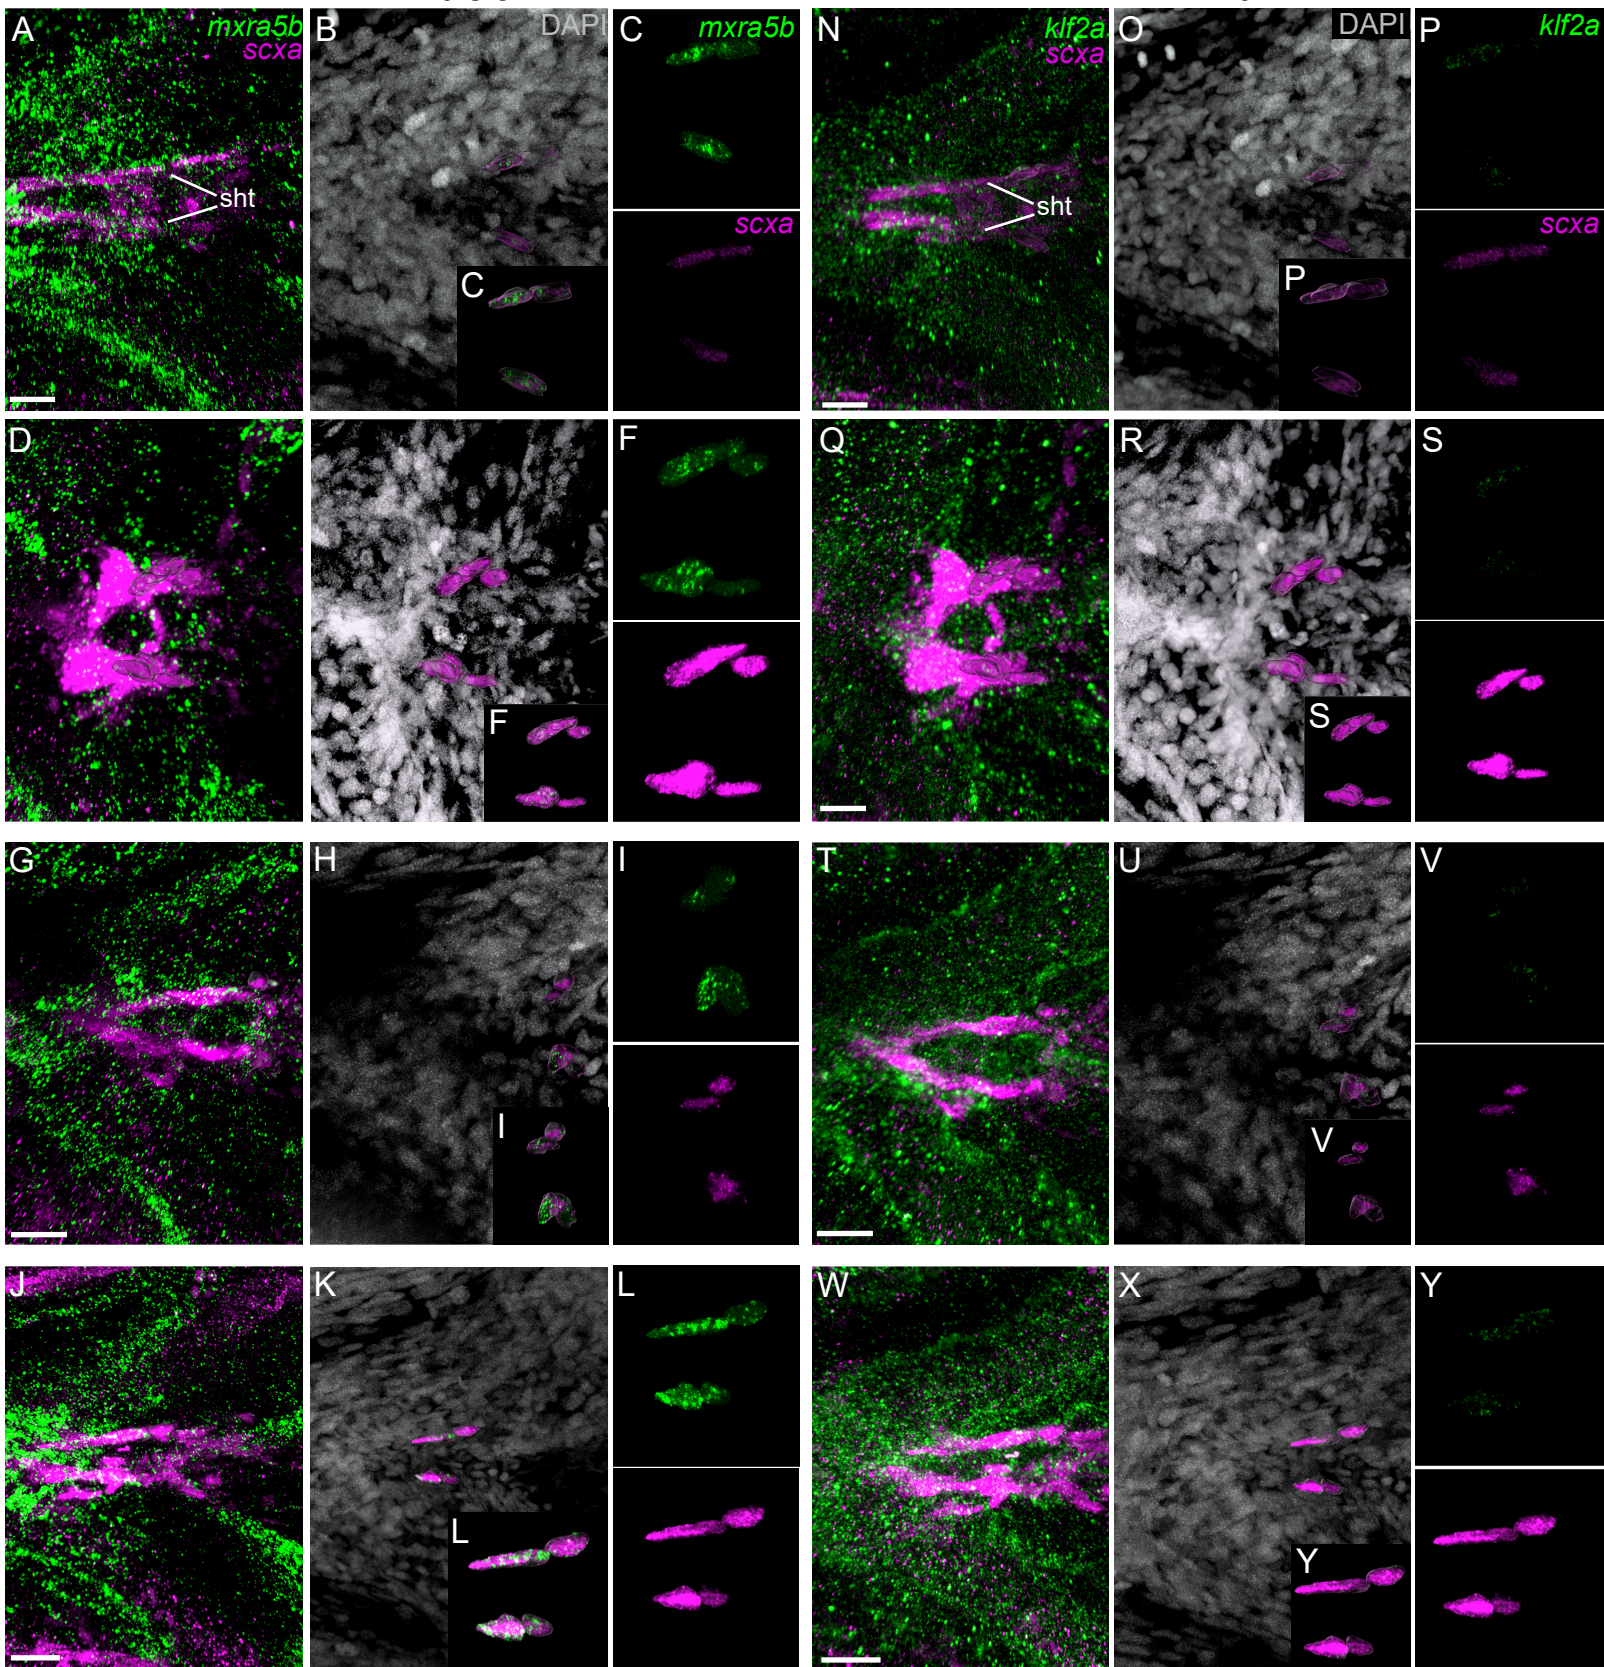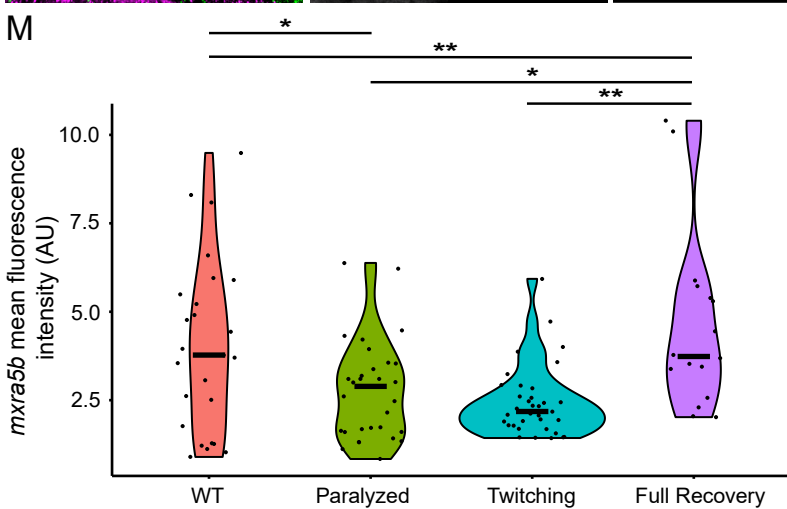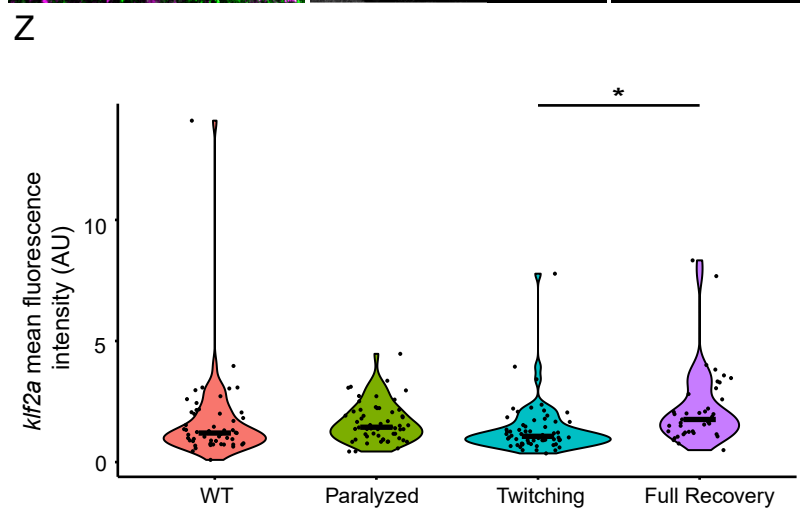

Supplement: supp [file elife-105802-supp-v1.zip]

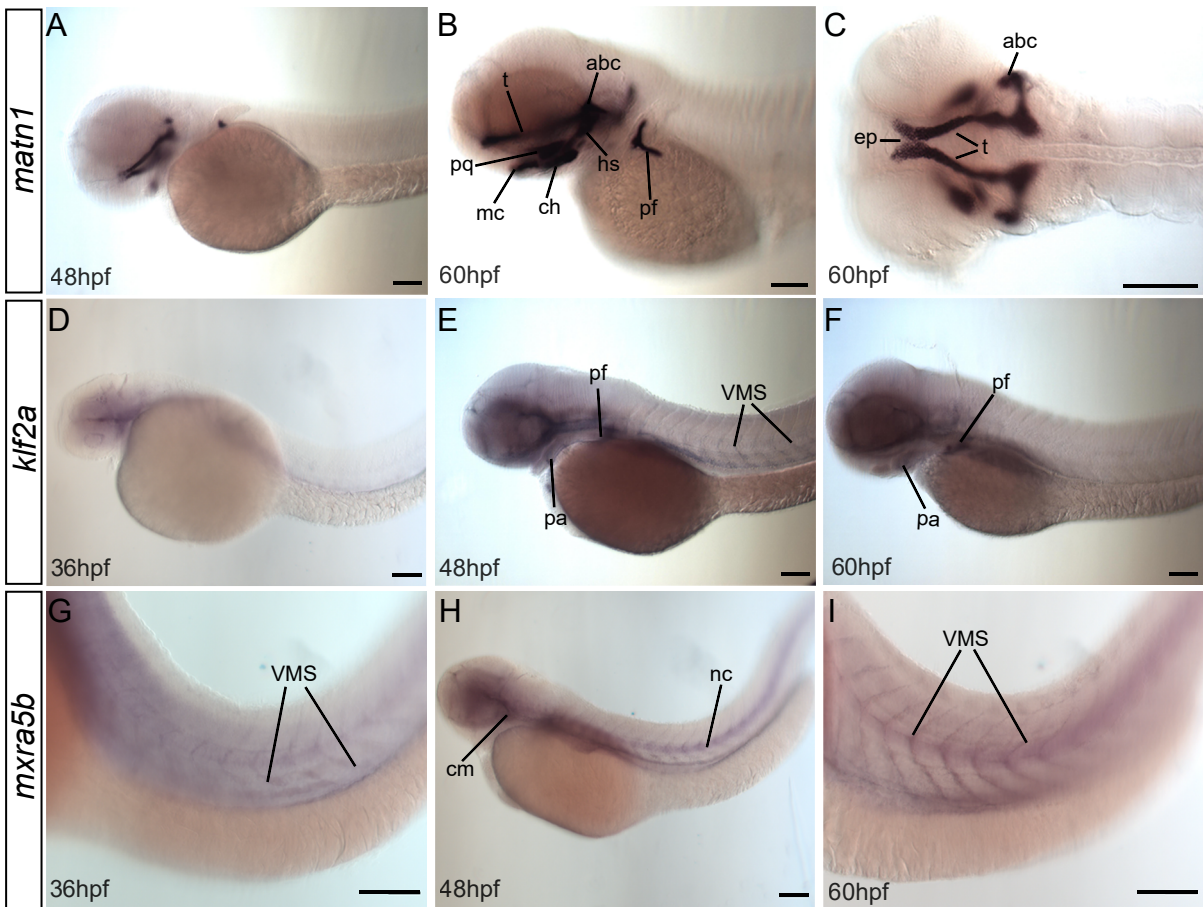

Supplement: supp [file elife-105802-supp-v1.zip]

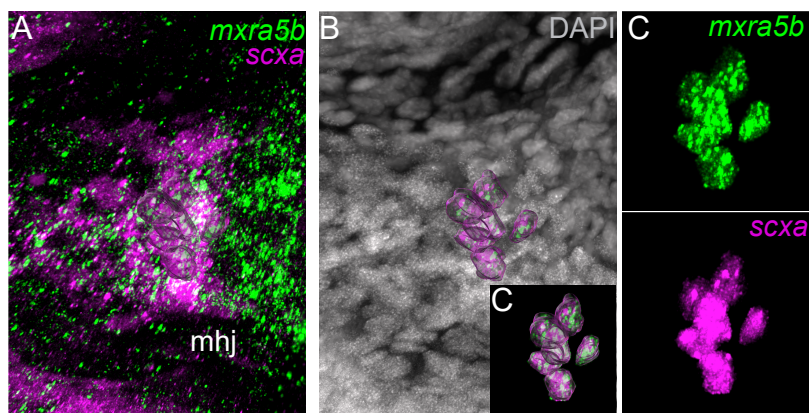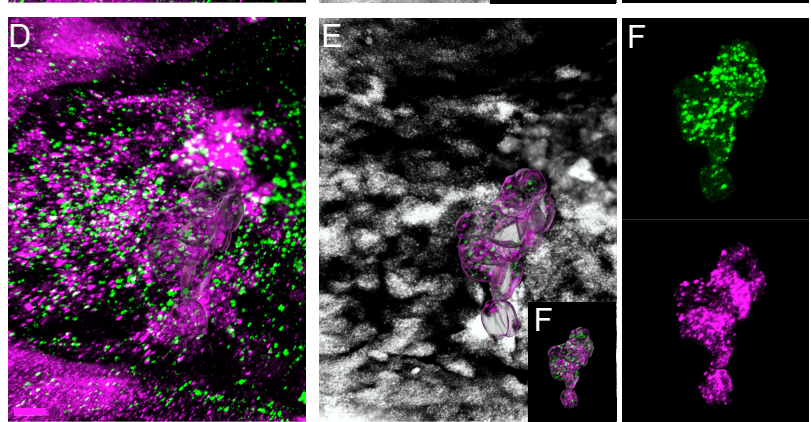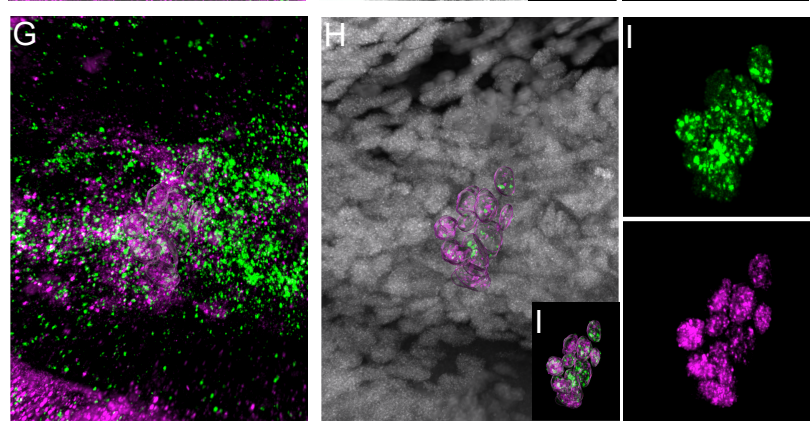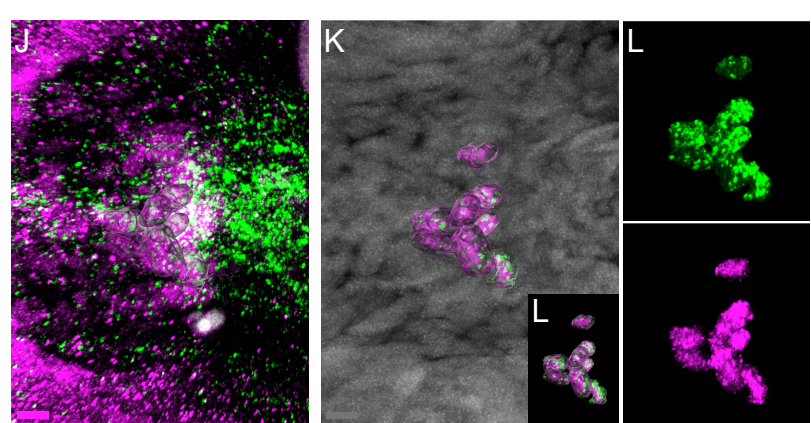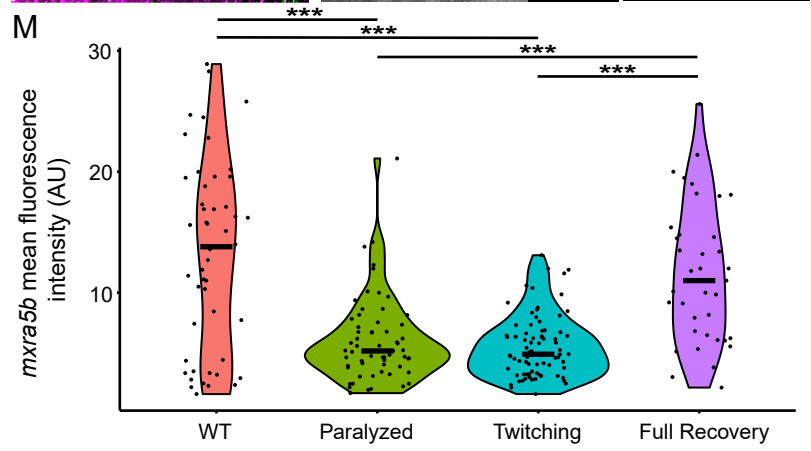

Supplement: supp [file elife-105802-supp-v1.zip]

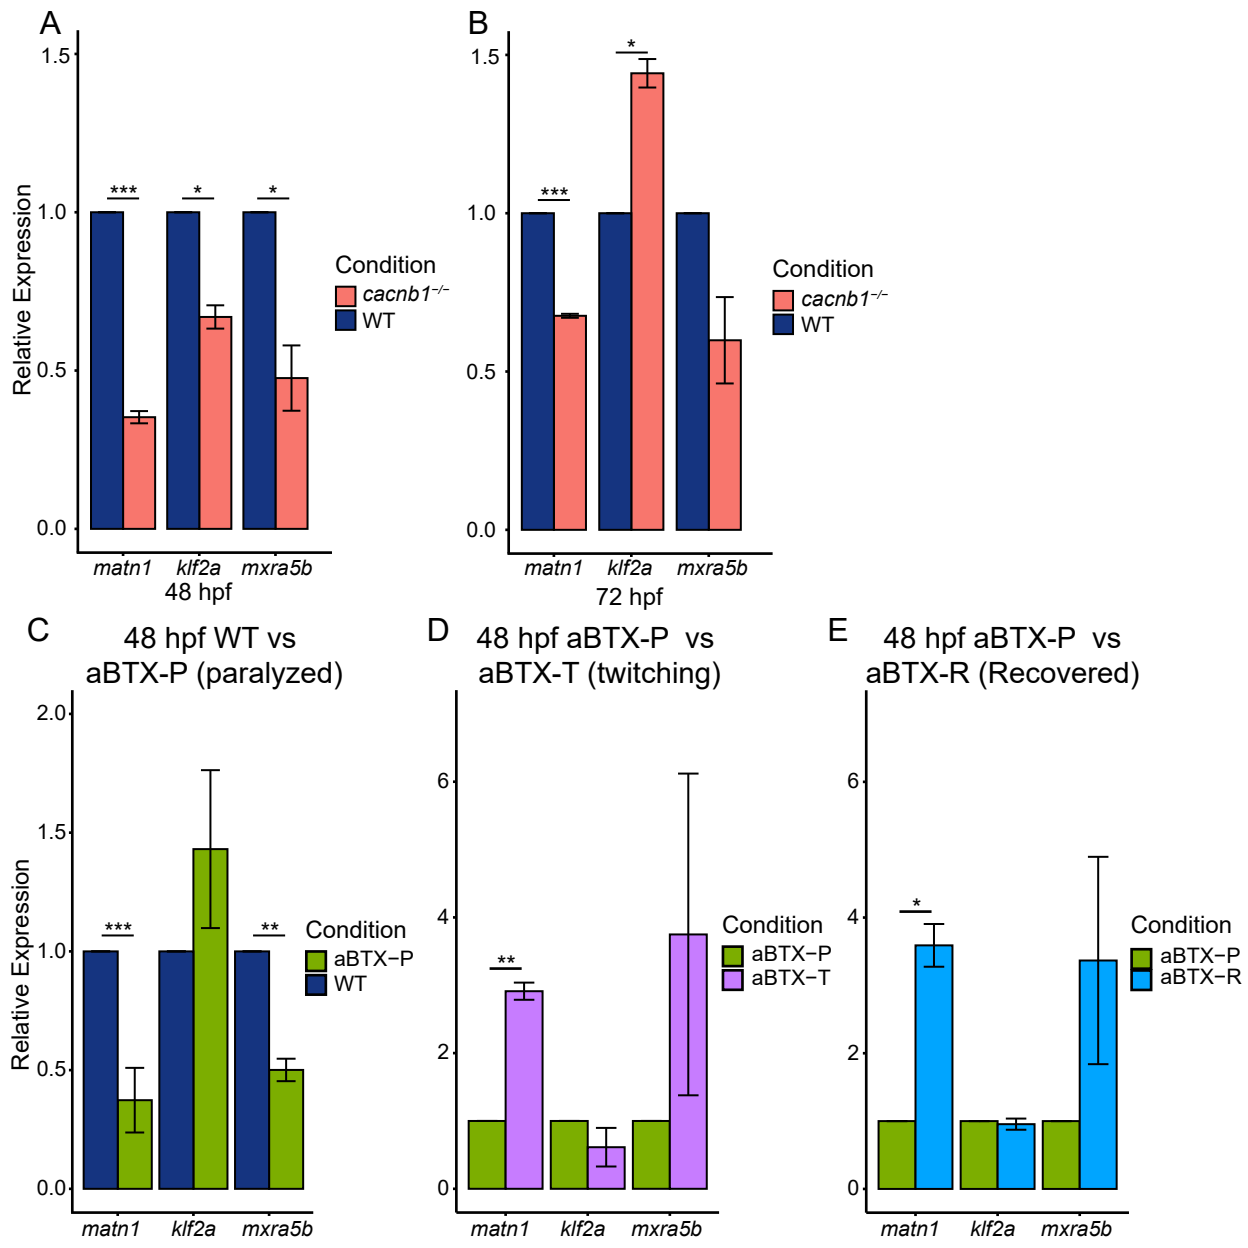

Supplement: supp [file elife-105802-supp-v1.zip]
